# Supplementary material for: Palladium-catalyzed ligand-free and aqueous Suzuki reaction for the construction of (hetero)aryl-substituted triphenylamine derivatives
Source: Royal Society of Chemistry journal article supplement (doi:10.1039/c2ra22275b), 2012-11-06

## *ESI for*

# **Palladium-Catalyzed Ligand-Free and Aqueous Suzuki Reaction for the Construction of (Hetero)aryl-Substituted Triphenylamine Derivatives**

Chun Liu,\* Xiaofeng Rao, Xinlong Song, Jieshan Qiu and Zilin Jin

State Key Laboratory of Fine Chemicals, Dalian University of Technology, Linggong Road 2, 116024, Dalian, China. E-mail: chunliu70@yahoo.com

## **Contents**

|                                                  |        |
|--------------------------------------------------|--------|
| Materials and Methods and Experimental Procedure | S1-S2  |
| Characterization Data                            | S2-S5  |
| References                                       | S5     |
| NMR Spectra for Products                         | S6-S24 |

### **Materials and Methods and Experimental Procedure**

**General :** Unless otherwise noted, all the reactions were carried out in air. All *N*-heteroaryl halides were purchased from Alfa Aesar or Avocado. 4-(diphenylamino)phenylboronic acid (**DPBA**) was purchased from Trusyn Chem-Tech Co., Ltd, China. Other chemicals were purchased from commercial sources and used without further purification. NMR spectra were recorded on a Bruker Advance II 400 spectrometer using TMS as internal standard (400 MHz for <sup>1</sup>H NMR and 100 MHz for <sup>13</sup>C NMR). Mass spectroscopy data of the products were collected with a MS-EI instrument. All products were isolated by short chromatography on a silica gel (200-300 mesh) column using petroleum ether (60-90 °C), unless otherwise noted. Compounds described in the literature were characterized by <sup>1</sup>H NMR spectra compared to reported data.

**General Procedure for the Suzuki Cross-Coupling of DPBA with Heteroaryl Halides:** A mixture of heteroaryl halide (0.25 mmol), **DPBA** (0.375 mmol), K<sub>2</sub>CO<sub>3</sub> (0.5 mmol), Pd(OAc)<sub>2</sub> (1.5 mol-%), ethanol (3 mL) and distilled water (1 mL) was stirred at 80 °C in air for indicated time. The reaction mixture was added to brine (15 mL) and extracted four times with ethyl acetate (4×15 mL). The solvent was concentrated under vacuum, and the product was isolated by short-column chromatography on silica gel (200-300 mesh).

**General Procedure for the Suzuki Cross-Coupling of DPBA with Aryl Bromides:** A mixture of aryl bromide (0.25 mmol), **DPBA** (0.375 mmol), K<sub>2</sub>CO<sub>3</sub> (0.5 mmol), Pd(OAc)<sub>2</sub> (0.5 mol-%), ethanol (3 mL) and distilled water (1 mL) was stirred at room temperature in air for indicated time. The reaction mixture was added to brine (15 mL) and extracted four times with ethyl acetate

(4×15 mL). The solvent was concentrated under vacuum, and the product was isolated by short-column chromatography on silica gel (200-300 mesh).

## Characterization Data

### **N,N-diphenyl-4-(pyridin-2-yl)aniline**<sup>1</sup>

<sup>1</sup>H NMR (400 MHz, CDCl<sub>3</sub>, 25 °C):  $\delta$  = 8.65 (d,  $J$  = 4.8 Hz, 1H), 7.87 (d,  $J$  = 8.8 Hz, 2H), 7.72-7.66 (m, 2H), 7.29-7.25 (m, 4H), 7.19-7.13 (m, 7H), 7.05 (t,  $J$  = 7.2 Hz, 2H) ppm.

### **4-(4-methylpyridin-2-yl)-N,N-diphenylaniline**

<sup>1</sup>H NMR (400 MHz, CDCl<sub>3</sub>, 25 °C)  $\delta$  = 8.50 (d,  $J$  = 2.4 Hz, 1H), 7.84 (d,  $J$  = 7.6 Hz, 2H), 7.49 (s, 1H), 7.28-7.25 (m, 4H), 7.14-7.12 (m, 6H), 7.06-7.02 (m, 3H), 2.40 (s, 3H) ppm. <sup>13</sup>C NMR (100 MHz, CDCl<sub>3</sub>, 25 °C)  $\delta$  = 157.16, 149.50, 148.72, 147.76, 147.70, 133.51, 129.46, 127.91, 124.83, 123.49, 123.31, 122.73, 121.04, 21.47 ppm. MS (EI):  $m/z$  = 336.1632 [M]<sup>+</sup>.

### **4-(5-methylpyridin-2-yl)-N,N-diphenylaniline**<sup>2</sup>

<sup>1</sup>H NMR (400 MHz, CDCl<sub>3</sub>, 25 °C)  $\delta$  = 8.47 (s, 1H), 7.83 (d,  $J$  = 8.4 Hz, 2H), 7.58-7.51 (m, 2H), 7.28-7.24 (m, 4H), 7.15-7.12 (m, 6H), 7.04 (t,  $J$  = 7.2 Hz, 2H), 2.36 (s, 3H) ppm.

### **4-(5-methoxypyridin-2-yl)-N,N-diphenylaniline**

<sup>1</sup>H NMR (400 MHz, CDCl<sub>3</sub>, 25 °C)  $\delta$  = 8.35 (d,  $J$  = 4.4 Hz, 1H), 7.81-7.79 (m, 2H), 7.60 (d,  $J$  = 8.0 Hz, 1H), 7.28-7.23 (m, 5H), 7.14-7.11 (m, 6H), 7.05-7.01 (m, 2H), 3.89 (s, 3H) ppm. <sup>13</sup>C NMR (100 MHz, CDCl<sub>3</sub>, 25 °C)  $\delta$  = 154.47, 149.89, 148.01, 147.61, 136.83, 133.11, 129.29, 127.25, 124.55, 123.63, 123.05, 121.54, 120.22, 55.71 ppm. MS (EI):  $m/z$  = 352.1585 [M]<sup>+</sup>.

### **4-(5-fluoropyridin-2-yl)-N,N-diphenylaniline**<sup>2</sup>

<sup>1</sup>H NMR (400 MHz, CDCl<sub>3</sub>, 25 °C)  $\delta$  = 8.50 (d,  $J$  = 2.8 Hz, 1H), 7.81 (d,  $J$  = 8.8 Hz, 2H), 7.67-7.64 (m, 1H), 7.46-7.41 (m, 1H), 7.29-7.26 (t, 4H), 7.15-7.12 (m, 6H), 7.05 (t,  $J$  = 7.2 Hz, 2H) ppm.

### **N,N-diphenyl-4-(5-(trifluoromethyl)pyridin-2-yl)aniline**<sup>3</sup>

<sup>1</sup>H NMR (400 MHz, CDCl<sub>3</sub>, 25 °C)  $\delta$  = 8.88 (s, 1H), 7.91-7.89 (m, 3H), 7.76 (d,  $J$  = 7.6 Hz, 1H), 7.31-7.27 (m, 4H), 7.16-7.13 (m, 6H), 7.10-7.07 (m, 2H) ppm.

### **4-(5-nitropyridin-2-yl)-N,N-diphenylaniline**<sup>2</sup>

<sup>1</sup>H NMR (400 MHz, CDCl<sub>3</sub>, 25 °C)  $\delta$  = 9.39 (d,  $J$  = 2.4 Hz, 1H), 8.42-8.39 (m, 1H), 7.94 (d,  $J$  = 8.8 Hz, 2H), 7.75 (d,  $J$  = 8.8 Hz, 1H), 7.29 (t,  $J$  = 8.0 Hz, 4H), 7.16-7.08 (m, 8H) ppm.

### **6-(4-(diphenylamino)phenyl)nicotinonitrile**

<sup>1</sup>H NMR (400 MHz, CDCl<sub>3</sub>, 25 °C)  $\delta$  = 8.87 (s, 1H), 7.92-7.90 (m, 3H), 7.74 (d,  $J$  = 7.6 Hz, 1H), 7.30 (t,  $J$  = 8.0 Hz, 4.4 Hz, 4H), 7.16-7.11 (m, 8H) ppm. <sup>13</sup>C NMR (100 MHz, CDCl<sub>3</sub>, 25 °C)  $\delta$  = 159.97, 152.46, 150.30, 146.94, 139.57, 130.01, 129.51, 128.31, 125.42, 124.05, 121.88, 118.90, 117.32, 106.63 ppm. MS (EI):  $m/z$  = 347.1426 [M]<sup>+</sup>.

**4-(6-methylpyridin-2-yl)-N,N-diphenylaniline<sup>2</sup>**

<sup>1</sup>H NMR (400 MHz, CDCl<sub>3</sub>, 25 °C)  $\delta$  = 7.84 (d, *J* = 8.4 Hz, 2H), 7.57 (t, *J* = 8.0 Hz, 1H), 7.43 (d, *J* = 8.0 Hz, 1H), 7.27-7.23 (m, 4H), 7.15-7.11 (m, 6H), 7.03-7.02 (m, 3H), 2.60 (s, 3H) ppm.

**4-(6-methoxypyridin-2-yl)-N,N-diphenylaniline<sup>2</sup>**

<sup>1</sup>H NMR (400 MHz, CDCl<sub>3</sub>, 25 °C)  $\delta$  = 7.92 (d, *J* = 8.8 Hz, 2H), 7.59 (t, *J* = 8.0 Hz, 1H), 7.29-7.25 (m, 5H), 7.15-7.11 (m, 6H), 7.04 (t, *J* = 7.2 Hz, 2H), 6.63 (d, *J* = 8.0 Hz, 1H), 4.01 (s, 3H) ppm.

**4-(6-fluoropyridin-2-yl)-N,N-diphenylaniline<sup>2</sup>**

<sup>1</sup>H NMR (400 MHz, CDCl<sub>3</sub>, 25 °C)  $\delta$  = 7.86 (d, *J* = 8.4 Hz, 2H), 7.81-7.75 (m, 1H), 7.55-7.52 (dd, *J* = 2.4 Hz, 7.6 Hz, 1H), 7.30-7.25 (m, 4H), 7.13 (t, 6H), 7.06 (d, *J* = 8.4 Hz, 2H), 6.79-6.77 (m, 1H) ppm.

**6-(4-(diphenylamino)phenyl)picolinaldehyde**

<sup>1</sup>H NMR (400 MHz, CDCl<sub>3</sub>, 25 °C)  $\delta$  = 10.14 (s, 1H), 7.97-7.94 (m, 2H), 7.89-7.83 (m, 3H), 7.31-7.27 (m, 4H), 7.19-7.14 (m, 6H), 7.10-7.06 (m, 2H) ppm. <sup>13</sup>C NMR (100 MHz, CDCl<sub>3</sub>, 25 °C)  $\delta$  = 194.08, 157.60, 152.70, 149.40, 147.31, 137.65, 131.49, 129.43, 127.87, 125.01, 123.75, 123.59, 122.85, 119.06 ppm. MS (EI): *m/z* = 350.1421 [M]<sup>+</sup>.

**6-(4-(diphenylamino)phenyl)picolinonitrile<sup>2</sup>**

<sup>1</sup>H NMR (400 MHz, CDCl<sub>3</sub>, 25 °C)  $\delta$  = 7.89-7.79 (m, 4H), 7.54 (d, *J* = 7.2 Hz, 1H), 7.29 (t, *J* = 8.0 Hz, 4H), 7.15-7.09 (m, 8H) ppm.

**1-(6-(4-(diphenylamino)phenyl)pyridin-2-yl)ethanone<sup>2</sup>**

<sup>1</sup>H NMR (400 MHz, CDCl<sub>3</sub>, 25 °C)  $\delta$  = 7.98 (d, *J* = 8.8 Hz, 2H), 7.92-7.83 (m, 3H), 7.29 (t, *J* = 8.0 Hz, 4H), 7.17-7.15 (t, 6H), 7.06 (t, *J* = 7.2 Hz, 2H), 2.79 (s, 3H) ppm.

**N,N-diphenyl-4-(pyridin-3-yl)aniline<sup>4</sup>**

<sup>1</sup>H NMR (400 MHz, CDCl<sub>3</sub>, 25 °C)  $\delta$  = 8.83 (d, *J* = 1.6 Hz, 1H), 8.55 (dd, *J* = 1.2 Hz, 4.8 Hz, 1H), 7.85-7.83 (m, 1H), 7.46-7.44 (m, 2H), 7.35-7.26 (m, 5H), 7.17-7.13 (m, 6H), 7.06 (t, *J* = 7.2 Hz, 2H) ppm.

**4-(6-methoxypyridin-3-yl)-N,N-diphenylaniline<sup>5</sup>**

<sup>1</sup>H NMR (400 MHz, CDCl<sub>3</sub>, 25 °C)  $\delta$  = 8.37 (s, 1H), 7.76 (dd, *J* = 12.0, 4.0 Hz, 1H), 7.40-7.37 (d, *J* = 7.6 Hz, 2H), 7.27-7.25 (m, 4H), 7.14-7.12 (m, 6H), 7.05-7.02 (t, *J* = 7.6 Hz, 2H), 6.80 (d, *J* = 8.0 Hz, 1H), 3.98 (s, 1H) ppm.

**N,N-diphenyl-4-(quinolin-2-yl)aniline<sup>2</sup>**

<sup>1</sup>H NMR (400 MHz, CDCl<sub>3</sub>, 25 °C)  $\delta$  = 8.18 (d, *J* = 8.4 Hz, 1H), 8.13 (d, *J* = 8.8 Hz, 1H), 8.04 (d, *J* = 8.8 Hz, 2H), 7.81 (t, *J* = 8.8 Hz, 2H), 7.70 (t, *J* = 7.2 Hz, 1H), 7.49 (t, *J* = 7.6 Hz, 1H), 7.28 (t, *J* = 8.0 Hz, 4H), 7.20-7.15 (m, 6H), 7.06 (t, *J* = 7.2 Hz, 2H) ppm.

**N,N-diphenyl-4-(quinolin-3-yl)aniline<sup>2</sup>**

<sup>1</sup>H NMR (400 MHz, CDCl<sub>3</sub>, 25 °C)  $\delta$  = 9.18 (d, *J* = 2.0 Hz, 1H), 8.26 (d, *J* = 1.6 Hz, 1H), 8.12 (d, *J* = 8.4 Hz, 1H), 7.86 (d, *J* = 8.0 Hz, 1H), 7.71 (t, *J* = 7.2 Hz, 1H), 7.60-7.55 (m, 3H), 7.30-7.26 (m, 4H),

7.21-7.15 (m, 6H), 7.07 (t,  $J = 7.2$  Hz, 2H) ppm.

**N,N-diphenyl-4-(quinolin-8-yl)aniline**

$^1\text{H NMR}$  (400 MHz,  $\text{CDCl}_3$ , 25 °C)  $\delta = 8.97$ - $8.96$  (m, 1H),  $8.21$ - $8.18$  (dd,  $J = 1.6$  Hz,  $7.6$  Hz, 1H),  $7.80$ - $7.74$  (m, 2H),  $7.64$  (d,  $J = 8.0$  Hz, 2H),  $7.59$  (d,  $J = 7.6$  Hz, 1H),  $7.43$ - $7.40$  (m, 1H),  $7.30$ - $7.26$  (m, 4H),  $7.21$ - $7.17$  (m, 6H),  $7.03$  (d,  $J = 8.4$  Hz, 2H) ppm.  $^{13}\text{C NMR}$  (100 MHz,  $\text{CDCl}_3$ , 25 °C)  $\delta = 150.08$ ,  $147.81$ ,  $147.05$ ,  $146.04$ ,  $140.34$ ,  $136.36$ ,  $133.35$ ,  $131.47$ ,  $130.14$ ,  $129.25$ ,  $128.85$ ,  $127.15$ ,  $126.37$ ,  $124.73$ ,  $122.92$ ,  $122.84$ ,  $120.93$  ppm. MS (EI):  $m/z = 372.1631$   $[\text{M}]^+$ .

**4-(1H-indol-5-yl)-N,N-diphenylaniline<sup>2</sup>**

$^1\text{H NMR}$  (400 MHz,  $\text{CDCl}_3$ , 25 °C)  $\delta = 8.16$  (s, 1H),  $7.83$  (s, 1H),  $7.53$  (d,  $J = 8.4$  Hz, 2H),  $7.44$  (s, 2H),  $7.28$ - $7.23$  (m, 5H),  $7.16$ - $7.13$  (m, 6H),  $7.01$  (t,  $J = 7.2$  Hz, 2H),  $6.59$  (t,  $J = 2.4$  Hz, 1H) ppm.

**N,N-diphenyl-4-(pyrimidin-5-yl)aniline<sup>2</sup>**

$^1\text{H NMR}$  (400 MHz,  $\text{CDCl}_3$ , 25 °C)  $\delta = 9.15$  (s, 1H),  $8.92$  (s, 2H),  $7.44$  (d,  $J = 8.8$  Hz, 2H),  $7.30$  (t,  $J = 8.0$  Hz, 4H),  $7.16$  (t,  $J = 8.8$  Hz, 6H),  $7.09$  (t,  $J = 7.2$  Hz, 2H) ppm.

**N,N-diphenyl-4-(pyrimidin-2-yl)aniline<sup>5</sup>**

$^1\text{H NMR}$  (400 MHz,  $\text{CDCl}_3$ , 25 °C)  $\delta = 8.74$  (d,  $J = 4.8$  Hz, 2H),  $8.28$  (d,  $J = 8.8$  Hz, 2H),  $7.30$ - $7.26$  (m, 4H),  $7.16$ - $7.13$  (m, 5H),  $7.11$ - $7.05$  (m, 4H) ppm.

**N,N-diphenyl-4-(pyrazin-2-yl)aniline<sup>2</sup>**

$^1\text{H NMR}$  (400 MHz,  $\text{CDCl}_3$ , 25 °C)  $\delta = 8.96$  (s, 1H),  $8.56$  (s, 1H),  $8.42$  (d,  $J = 2.4$  Hz, 1H),  $7.88$  (d,  $J = 8.8$  Hz, 2H),  $7.29$  (t,  $J = 8.0$  Hz, 4H),  $7.15$  (d,  $J = 8.8$  Hz, 6H),  $7.08$  (t,  $J = 7.2$  Hz, 2H) ppm.

**N,N-diphenyl-4-(thiophen-2-yl)aniline<sup>6</sup>**

$^1\text{H NMR}$  (400 MHz,  $\text{CDCl}_3$ , 25 °C)  $\delta = 7.48$ - $7.46$  (m, 2H),  $7.28$ - $7.21$  (m, 6H),  $7.12$  (d,  $J = 7.6$  Hz, 4H),  $7.08$ - $7.01$  (m, 5H) ppm.

**N,N-diphenyl-4-(thiophen-3-yl)aniline<sup>2</sup>**

$^1\text{H NMR}$  (400 MHz,  $\text{CDCl}_3$ , 25 °C)  $\delta = 7.47$  (d,  $J = 8.4$  Hz, 2H),  $7.37$ - $7.35$  (m, 3H),  $7.28$ - $7.24$  (t, 4H),  $7.10$  (t,  $J = 8.0$  Hz, 6H),  $7.02$  (t,  $J = 7.2$  Hz, 2H) ppm.

**N,N-diphenyl-4-(thiazol-2-yl)aniline<sup>7</sup>**

$^1\text{H NMR}$  (400 MHz,  $\text{CDCl}_3$ , 25 °C)  $\delta = 7.82$ - $7.80$  (m, 3H),  $7.31$ - $7.27$  (t,  $J = 8.4$  Hz, 3H),  $7.25$ - $7.24$  (m, 2H),  $7.14$  (d,  $J = 7.6$  Hz, 4H),  $7.10$ - $7.07$  (m, 4H) ppm.

**4,4'-(pyridine-2,6-diyl)bis(N,N-diphenylaniline)<sup>2</sup>**

$^1\text{H NMR}$  (400 MHz,  $\text{CDCl}_3$ , 25 °C)  $\delta = 8.00$  (d,  $J = 8.4$  Hz, 4H),  $7.73$  (t,  $J = 8.0$  Hz, 1H),  $7.56$  (d,  $J = 7.6$  Hz, 2H),  $7.27$  (t,  $J = 8.0$  Hz, 8H),  $7.16$ - $7.13$  (m, 12H),  $7.04$  (t,  $J = 7.2$  Hz, 4H) ppm.

**4'-(diphenylamino)-[1,1'-biphenyl]-4-carbonitrile<sup>2</sup>**

$^1\text{H NMR}$  (400 MHz,  $\text{CDCl}_3$ , 25 °C)  $\delta = 7.70$ - $7.64$  (m, 4H),  $7.47$  (d,  $J = 8.8$  Hz, 2H),  $7.29$  (t,  $J = 8.0$  Hz, 4H),  $7.15$ - $7.12$  (m, 6H),  $7.07$  (t,  $J = 7.2$  Hz, 2H) ppm.

**4'-(diphenylamino)-[1,1'-biphenyl]-2-carbonitrile<sup>2</sup>**

<sup>1</sup>H NMR (400 MHz, CDCl<sub>3</sub>, 25 °C)  $\delta$  = 7.74-7.71 (m, 1H), 7.60-7.57 (m, 1H), 7.49 (d,  $J$  = 8.0 Hz, 1H), 7.43-7.41 (m, 2H), 7.39-7.35 (m, 1H), 7.30-7.26 (m, 4H), 7.17-7.12 (m, 6H), 7.06 (t,  $J$  = 7.2 Hz, 2H) ppm.

**4'-nitro-N,N-diphenyl-[1,1'-biphenyl]-4-amine<sup>4</sup>**

<sup>1</sup>H NMR (400 MHz, CDCl<sub>3</sub>, 25 °C)  $\delta$  = 8.28-8.26 (m, 2H), 7.71-7.69 (m, 2H), 7.51-7.49 (m, 2H), 7.30-7.28 (m, 4H), 7.16-7.14 (m, 6H), 7.08 (t,  $J$  = 7.2 Hz, 2H) ppm.

**4'-methoxy-N,N-diphenyl-[1,1'-biphenyl]-4-amine<sup>8</sup>**

<sup>1</sup>H NMR (400 MHz, CDCl<sub>3</sub>, 25 °C)  $\delta$  = 7.50 (d,  $J$  = 8.8 Hz, 2H), 7.43 (d,  $J$  = 8.4 Hz, 2H), 7.26 (t,  $J$  = 8.0 Hz, 4H), 7.12 (d,  $J$  = 7.6 Hz, 6H), 7.03 (t,  $J$  = 7.2 Hz, 2H), 6.96 (d,  $J$  = 8.4 Hz, 2H), 3.85 (s, 3H) ppm.

**N<sup>4</sup>,N<sup>4</sup>,N<sup>4</sup>,N<sup>4</sup>-tetraphenyl-[1,1'-biphenyl]-4,4'-diamine<sup>9</sup>**

<sup>1</sup>H NMR (400 MHz, CDCl<sub>3</sub>, 25 °C)  $\delta$  = 7.44 (s, 4H), 7.30-7.24 (t, 10H), 7.13-7.08 (m, 10H), 7.01 (s, 4H) ppm.

**References**

1. C. S. K. Mak, D. Pentlechner, M. Stich, O. S. Wolfbeis, W. K. Chan and H. Yersin, *Chem. Mater.*, 2009, **21**, 2173.
2. C. Liu, Q. Ni and J. Qiu, *Eur. J. Org. Chem.*, 2011, 3009.
3. J.-i. Nishida, H. Echizen, T. Iwata and Y. Yamashita, *Chem. Lett.*, 2005, **34**, 1378.
4. K. Kowalski, N. J. Long, M. K. Kuimova, A. A. Kornyshev, A. G. Taylor and A. J. P. White, *New J. Chem.*, 2009, **33**, 598.
5. C. Liu, Y. Wu, N. Han and J. Qiu, *Appl. Organometal. Chem.*, 2011, **25**, 862.
6. J. Liu, X. Guo, L. J. Bu, Z. Y. Xie, Y. X. Cheng, Y. H. Geng, L. X. Wang, X. B. Jing and F. S. Wang, *Adv. Funct. Mater.*, 2007, **17**, 1917.
7. X. Yang, Y. Zhao, X. Zhang, R. Li, J. Dang, Y. Li, G. Zhou, Z. Wu, D. Ma, W.-Y. Wong, X. Zhao, A. Ren, L. Wang and X. Hou, *J. Mater. Chem.*, 2012, **22**, 7136.
8. T. Shimada, M. Sasaki, T. Aruga and M. Umeda, *Bul. Chem. Soc. Jap.*, 2000, **73**, 785.
9. W. Z. Yuan, P. Lu, S. Chen, J. W. Lam, Z. Wang, Y. Liu, H. S. Kwok, Y. Ma and B. Z. Tang, *Adv. Mater.*, 2010, **22**, 2159.

## NMR Spectra for Products

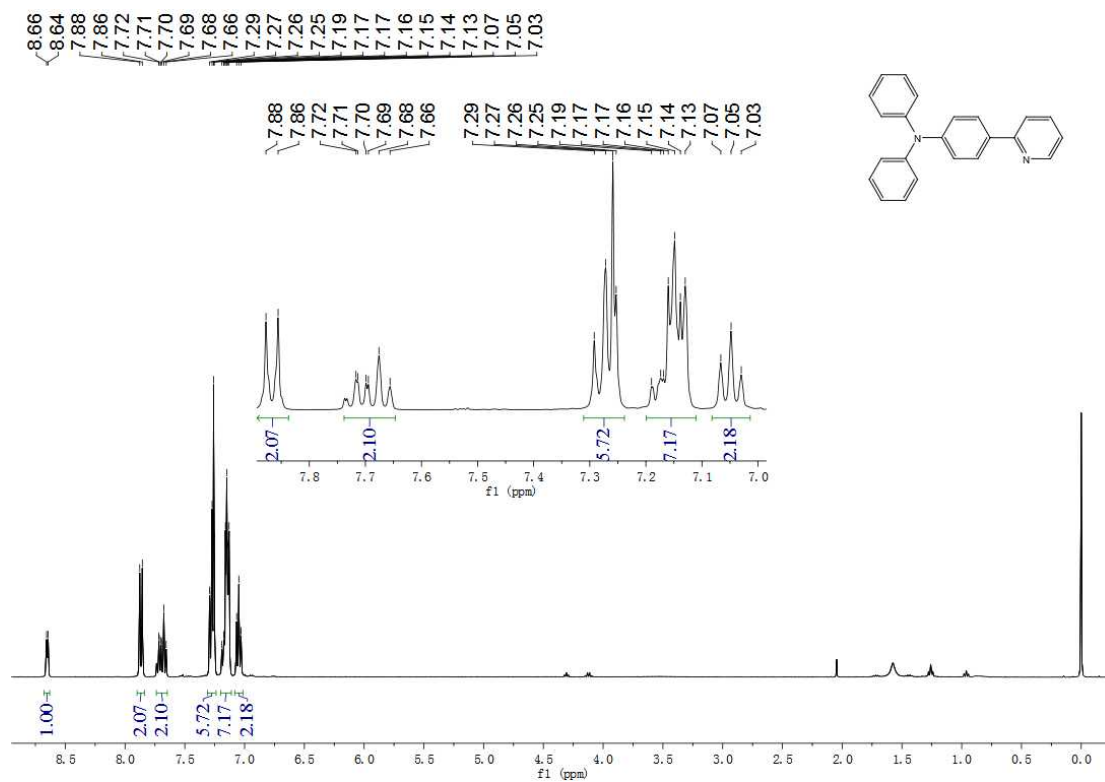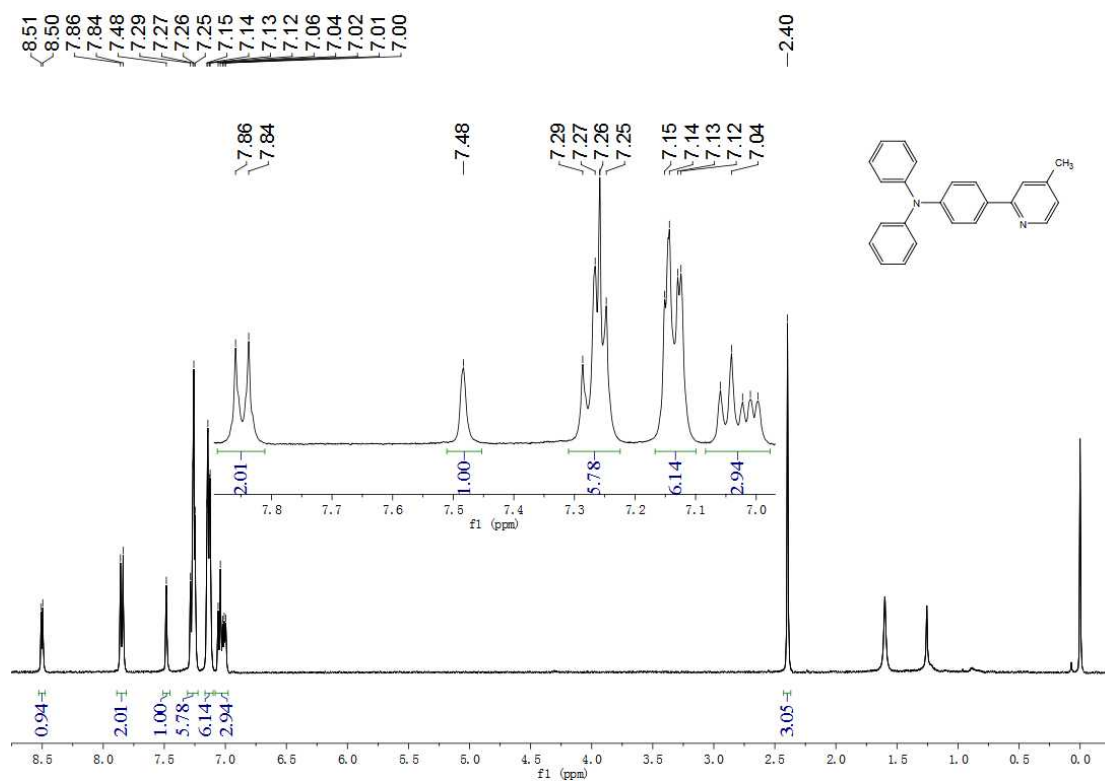

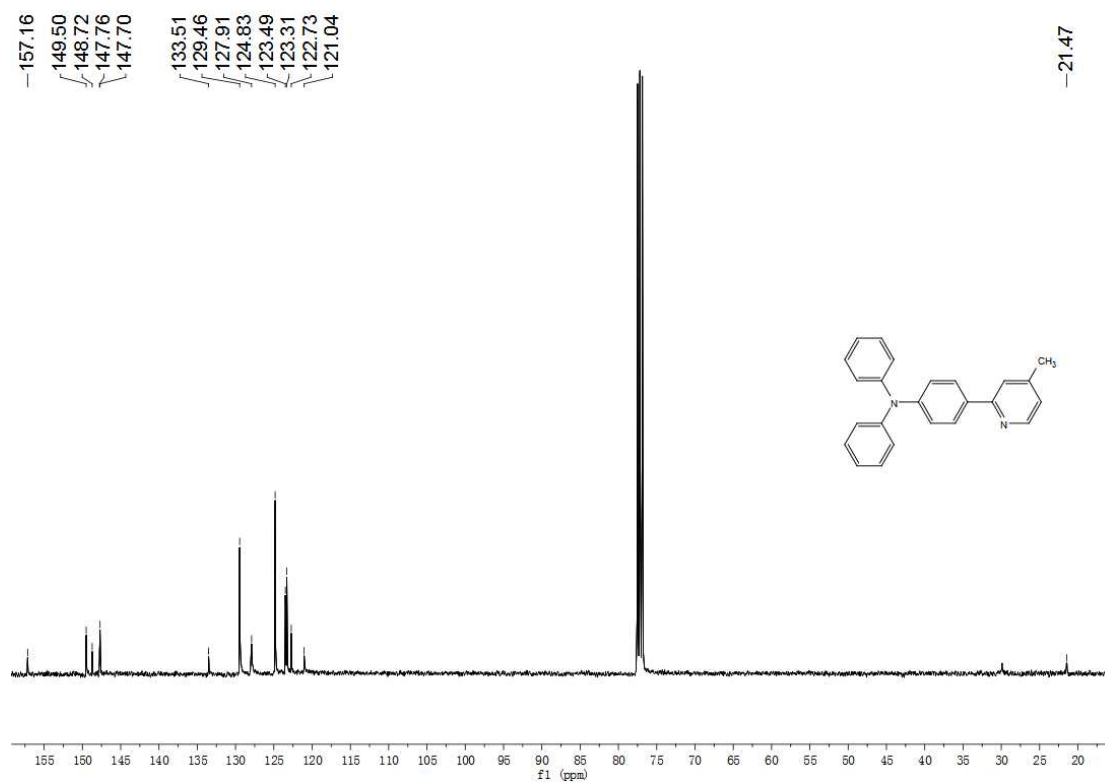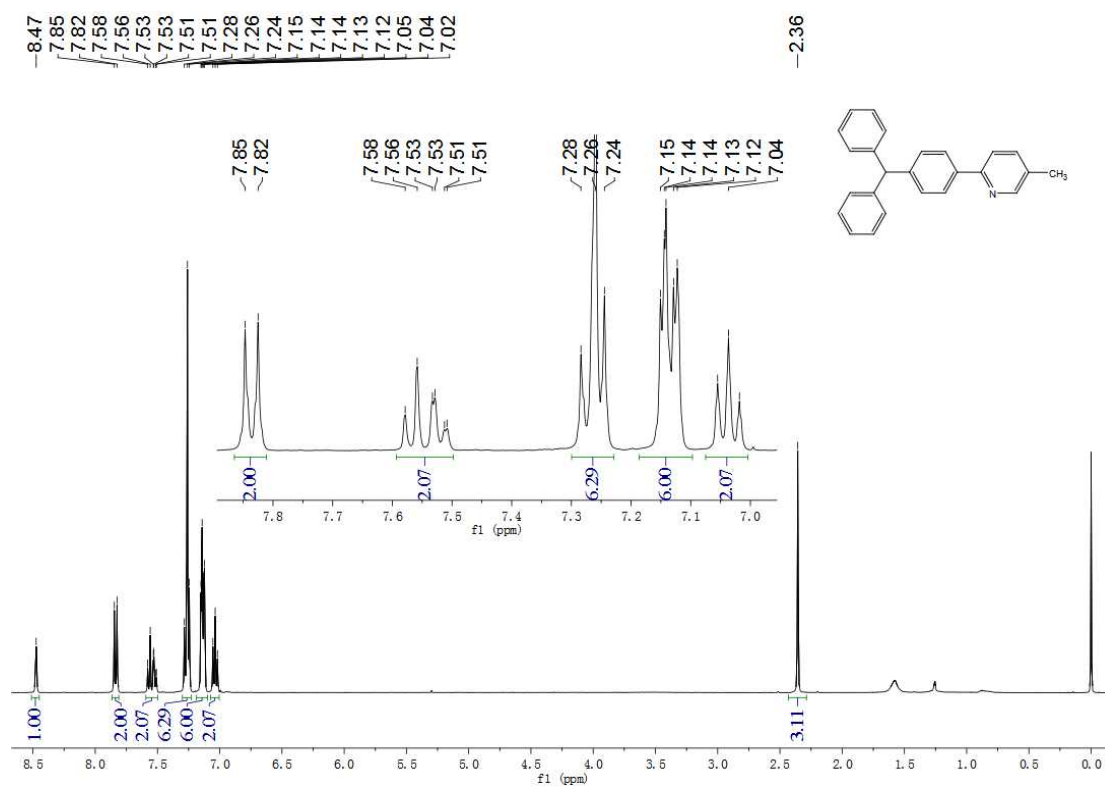

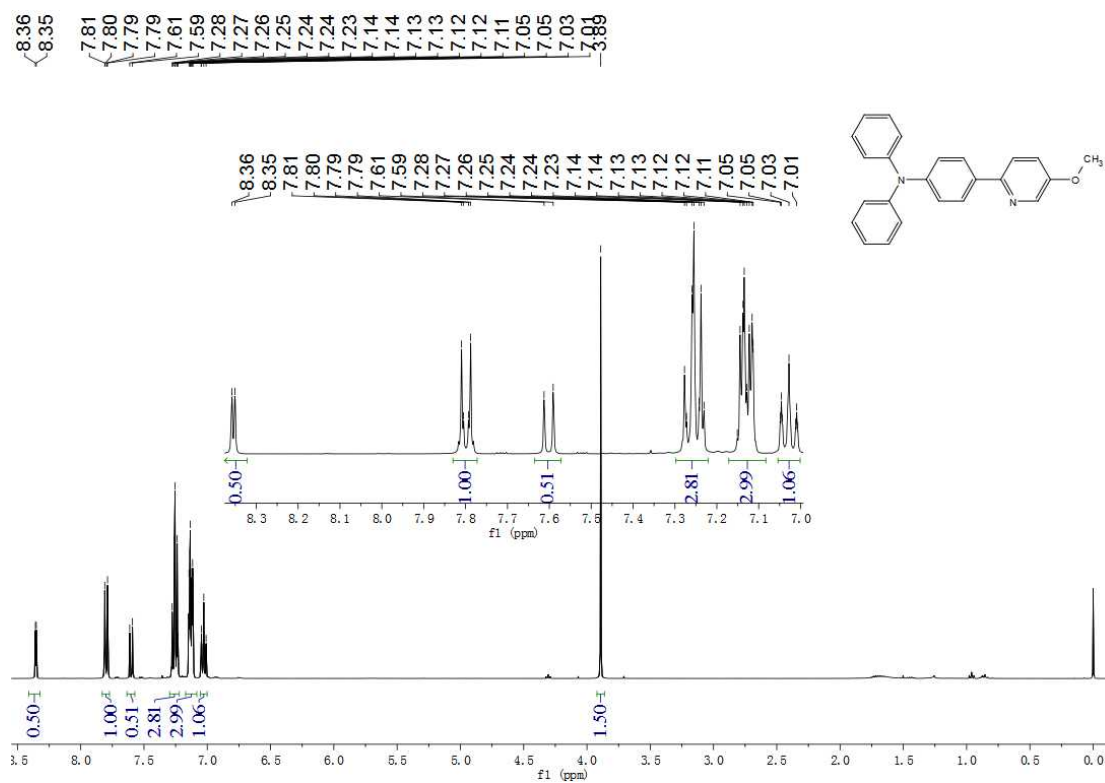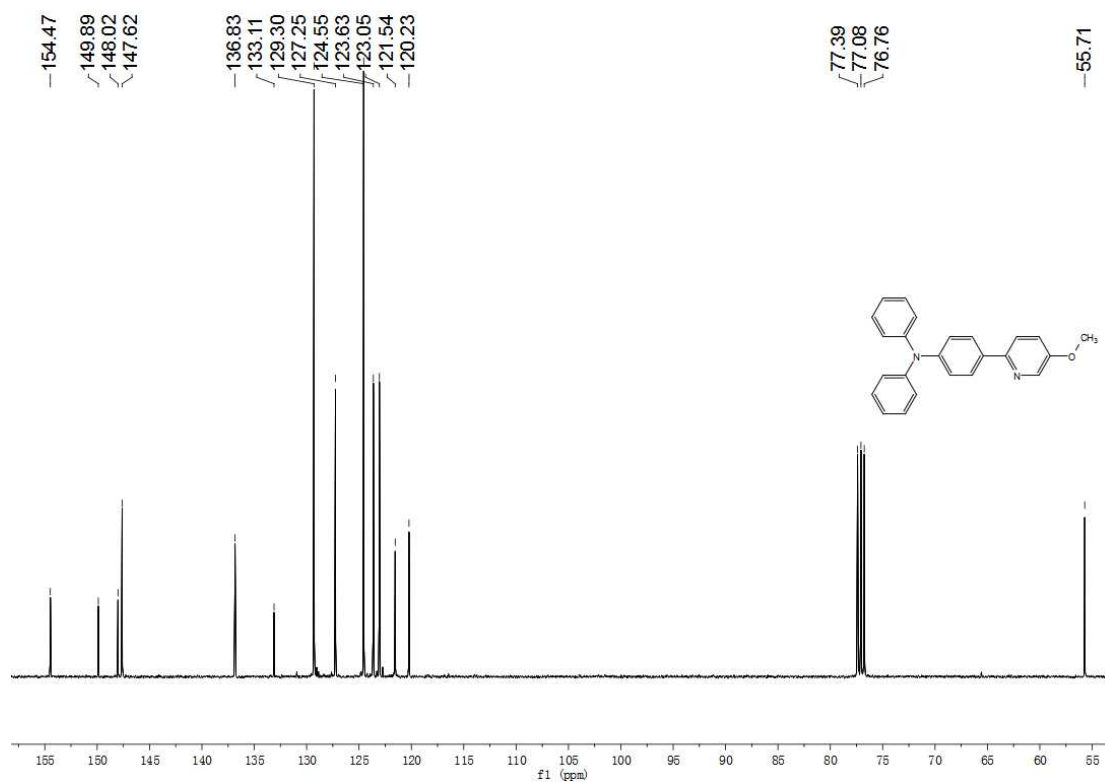



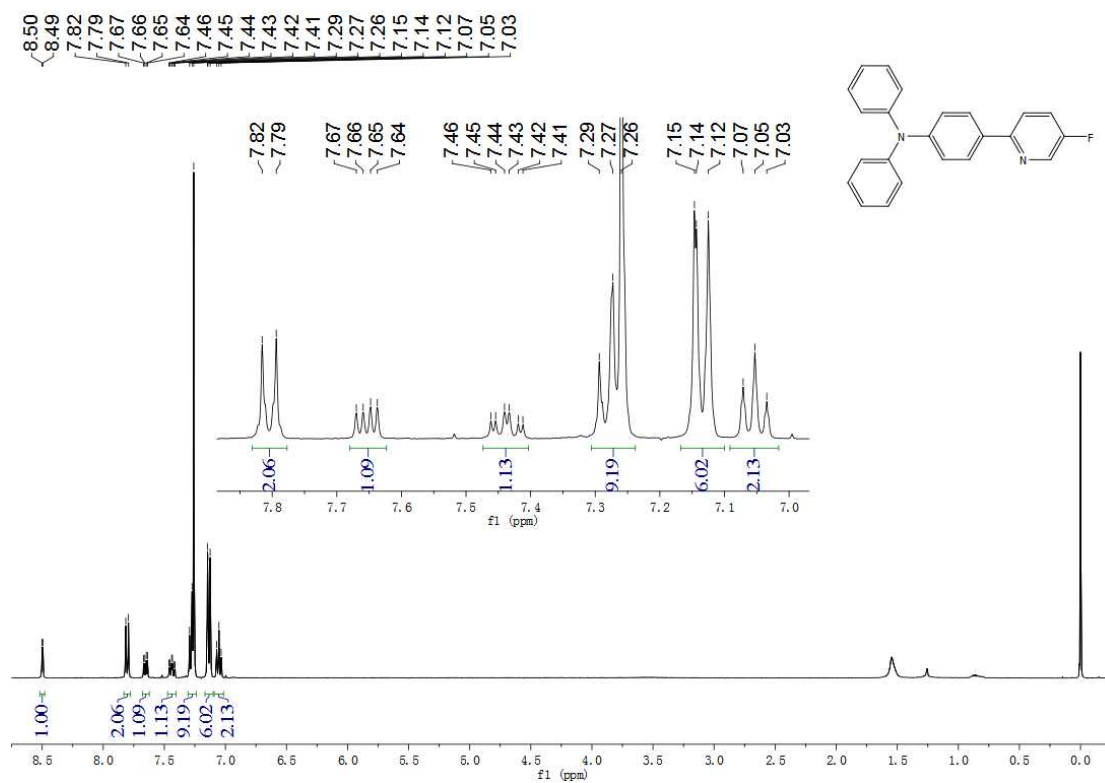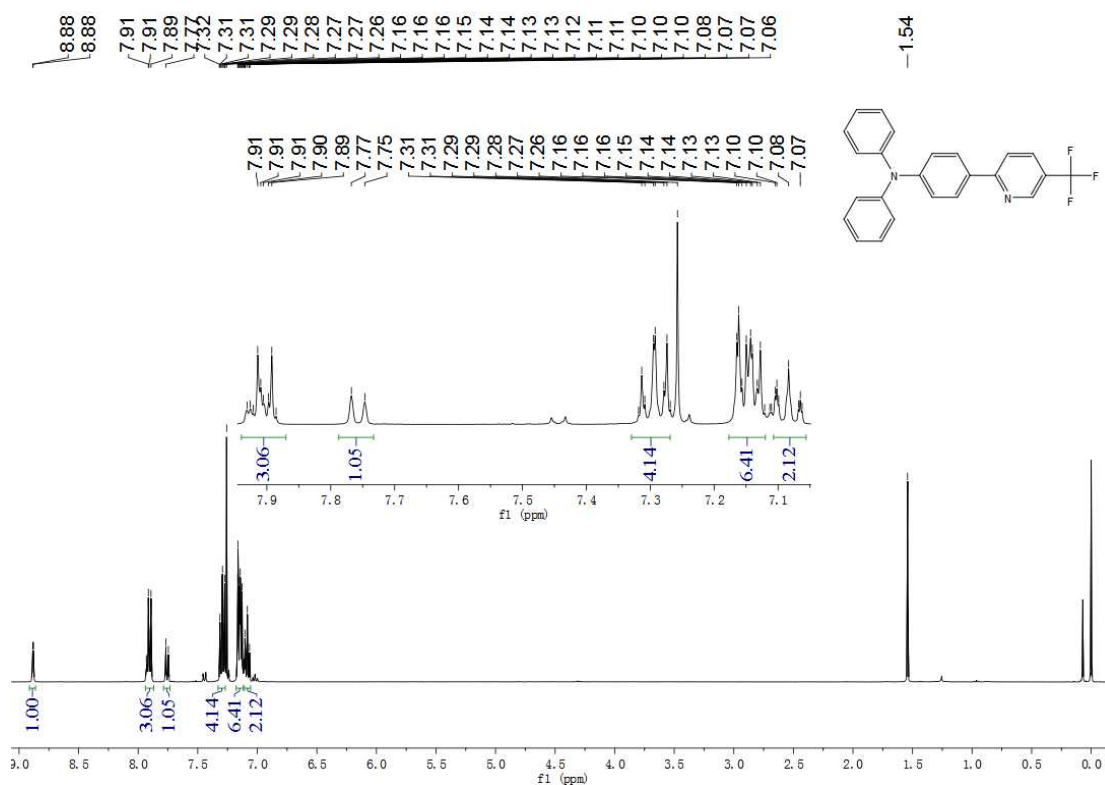

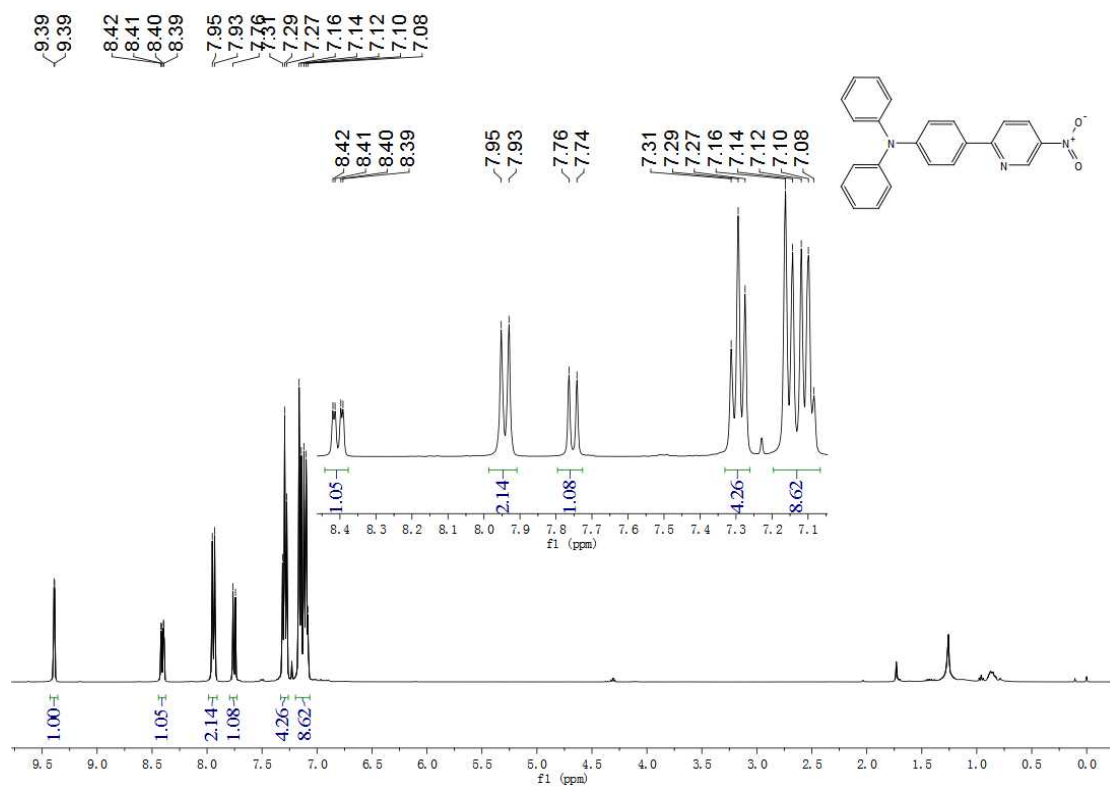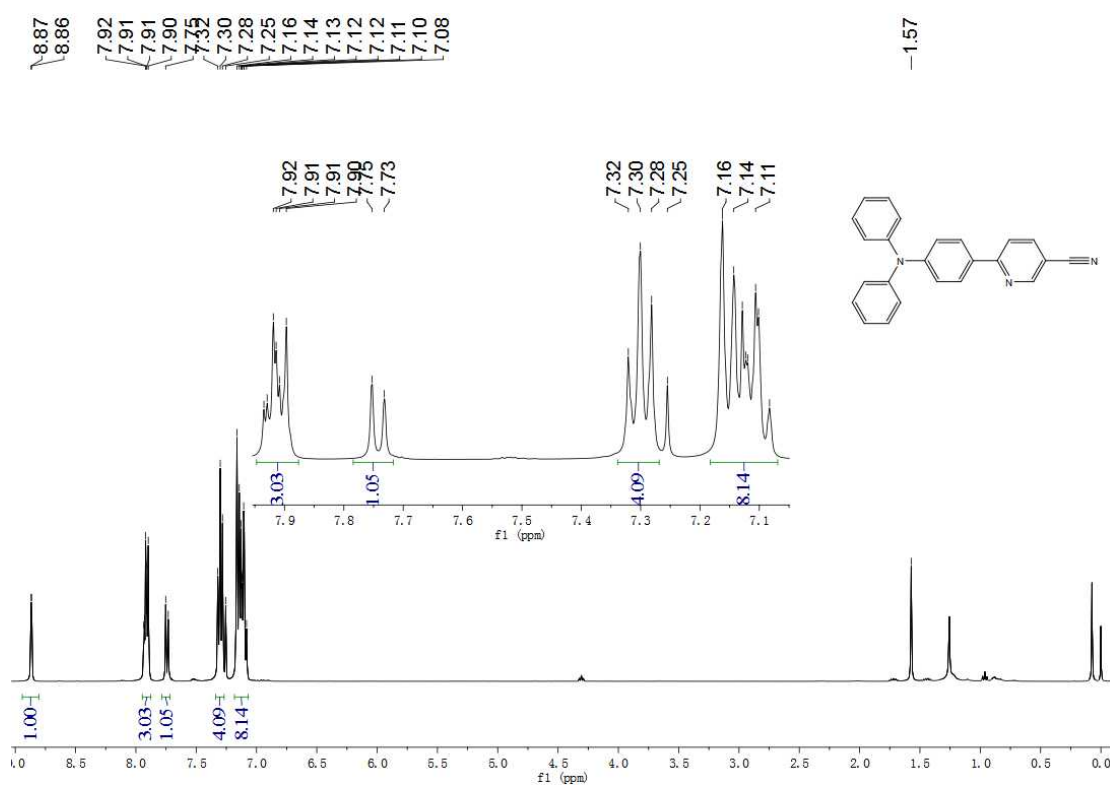

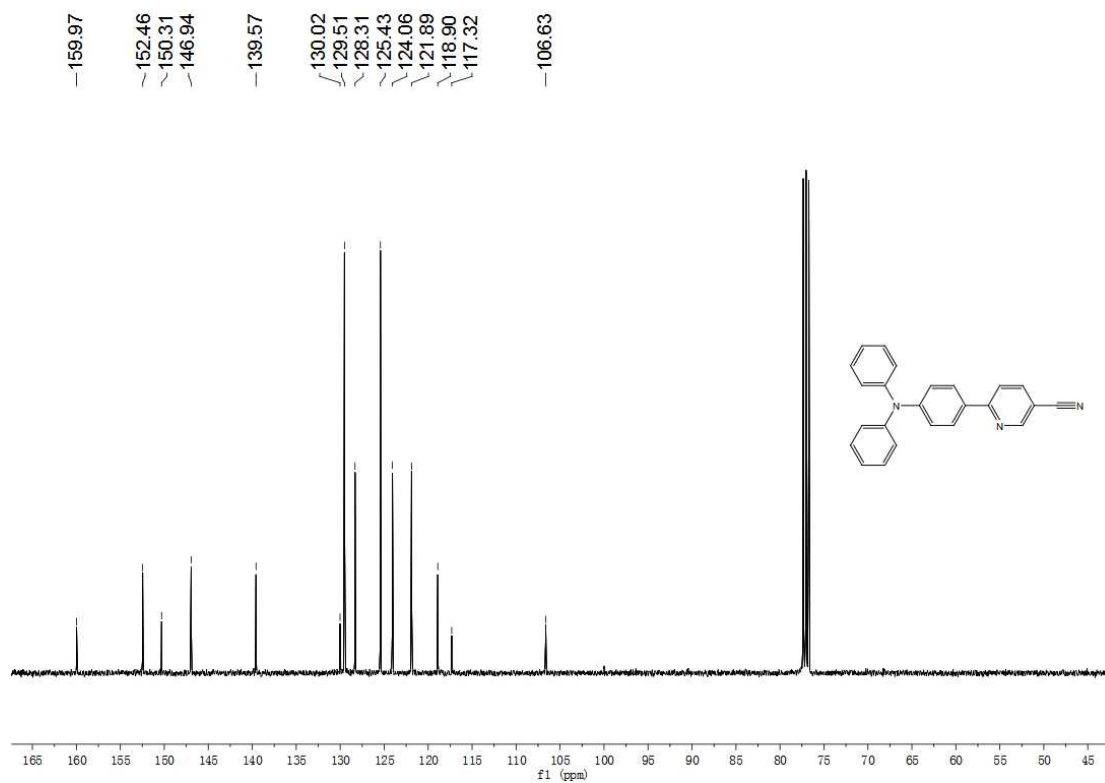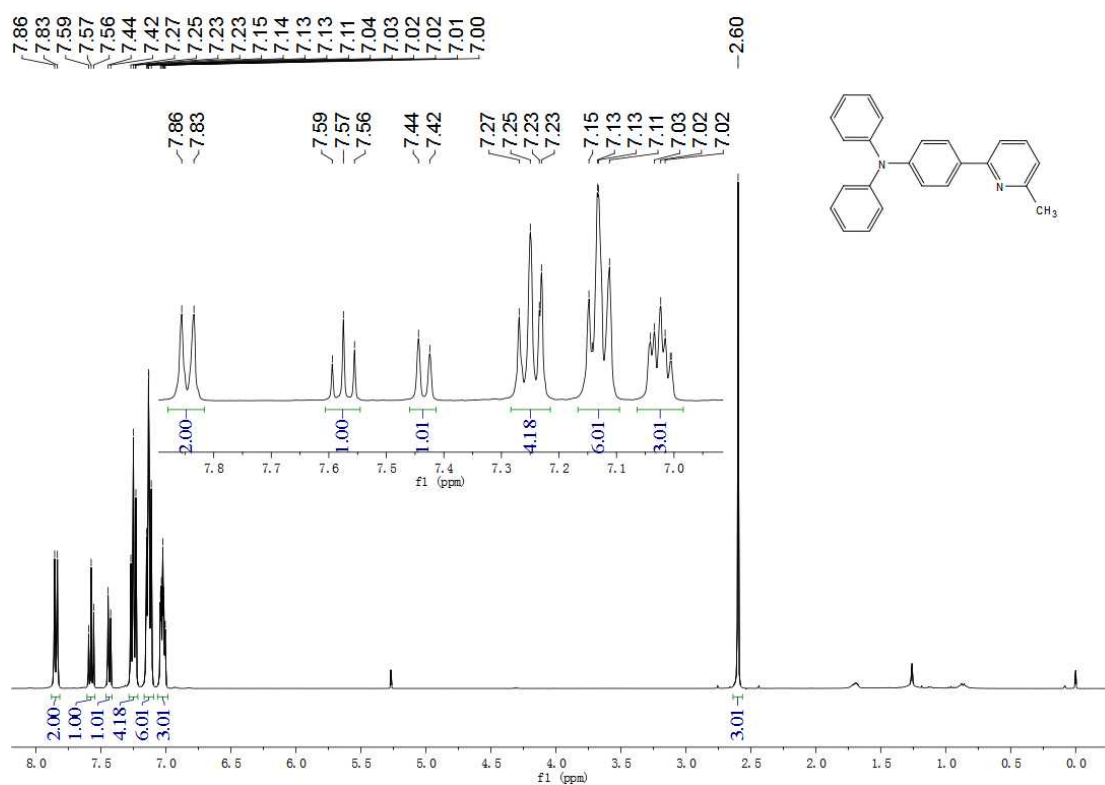

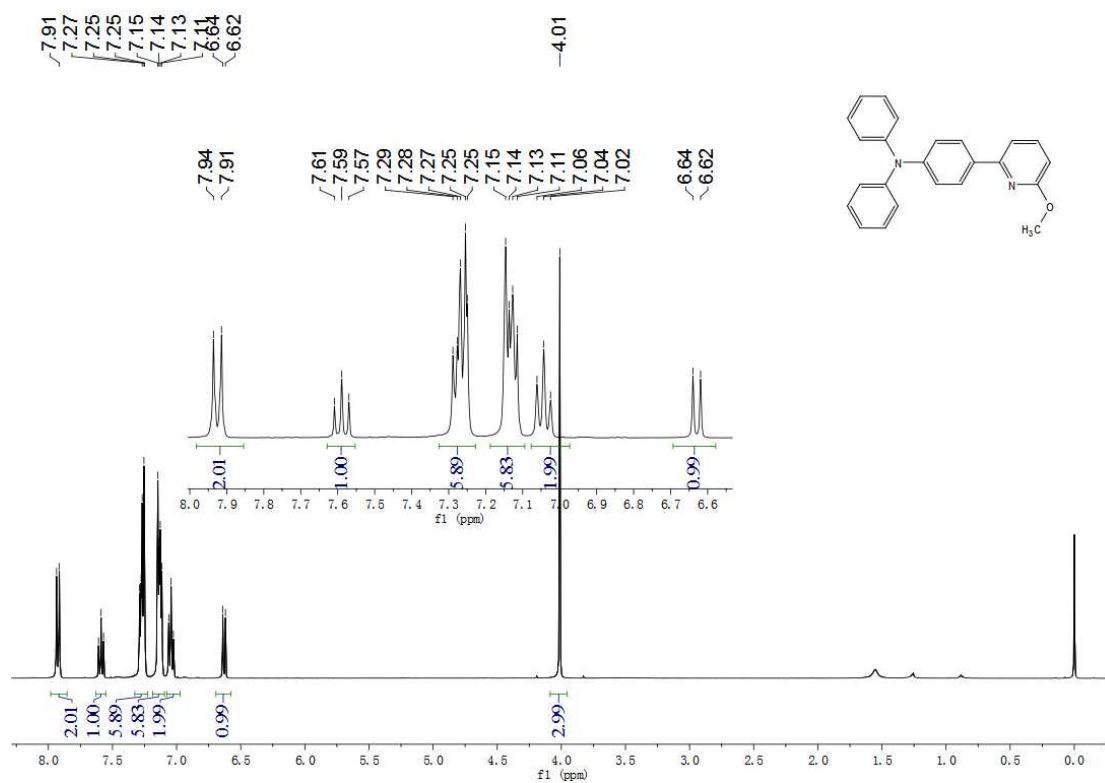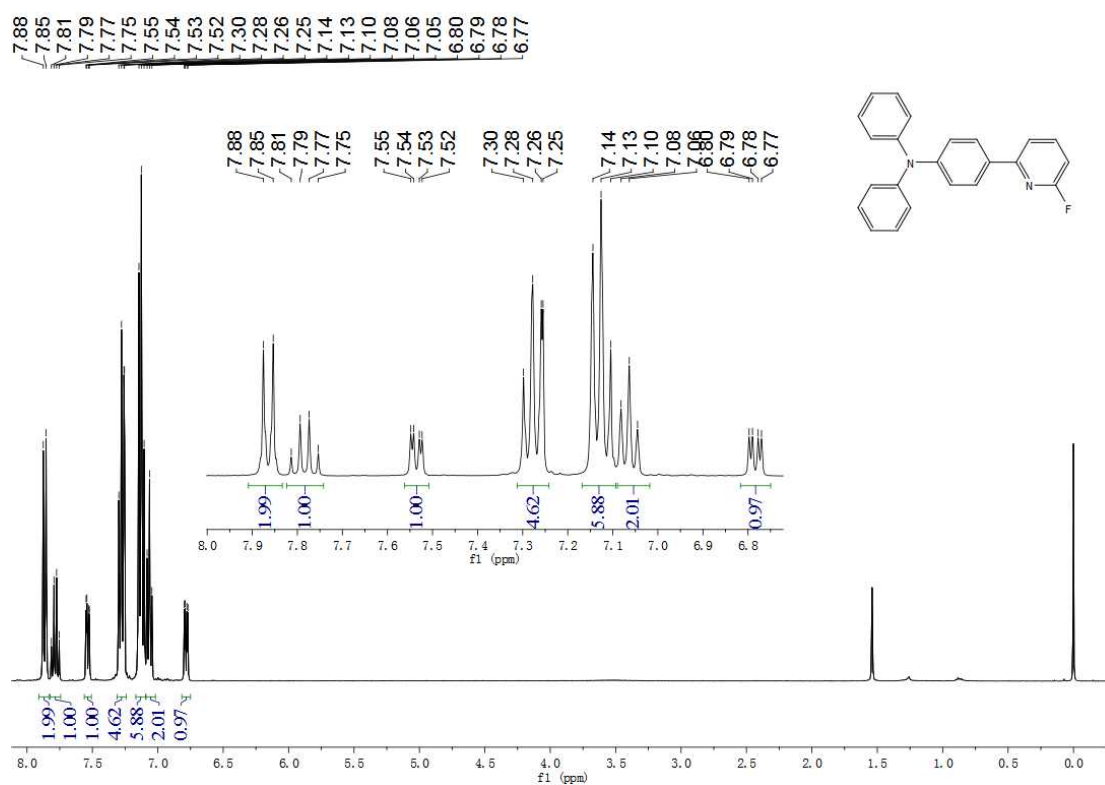

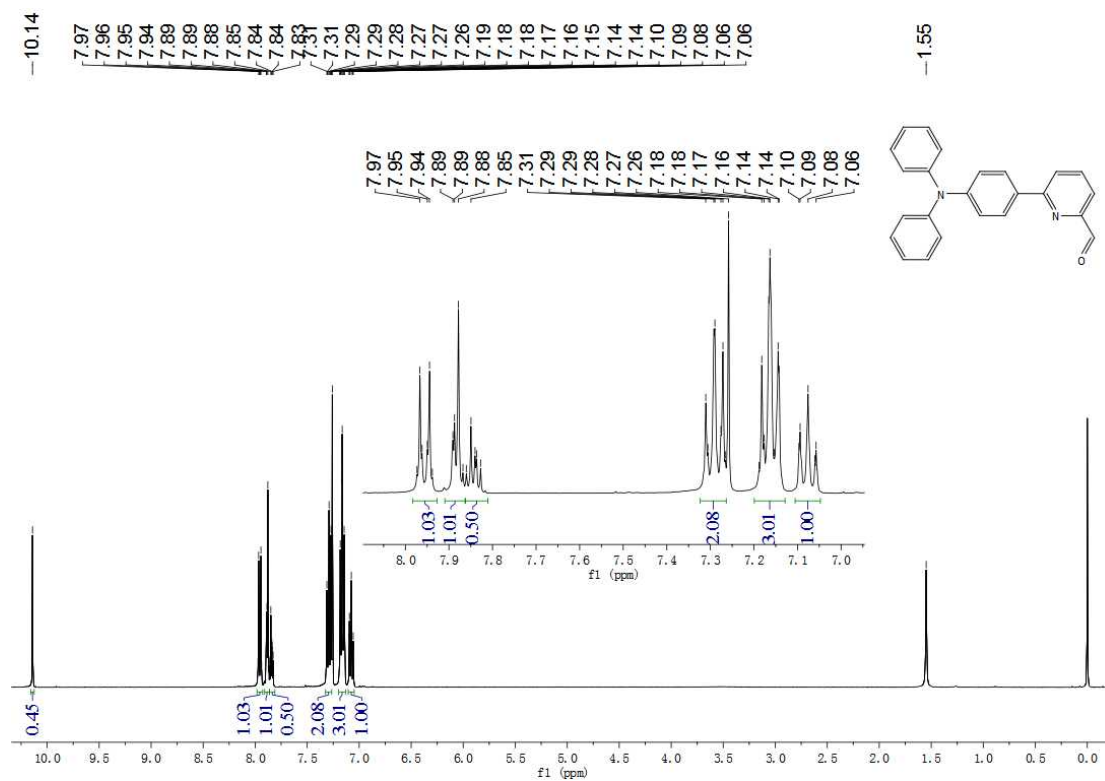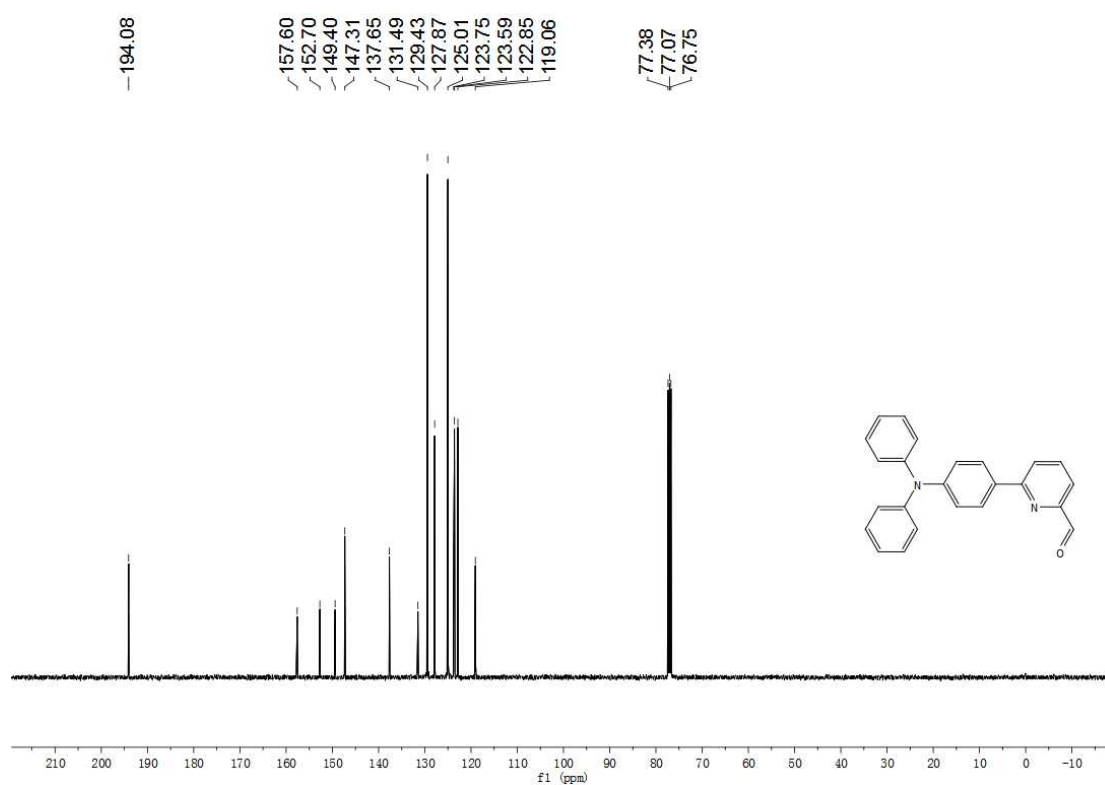

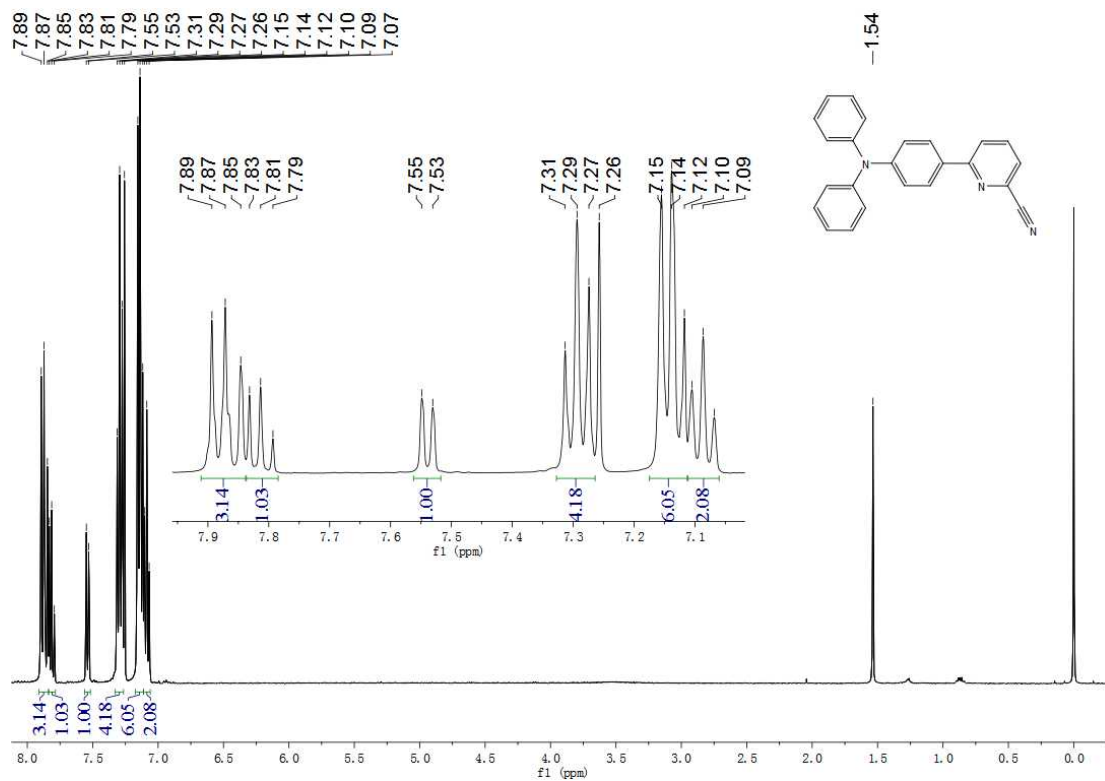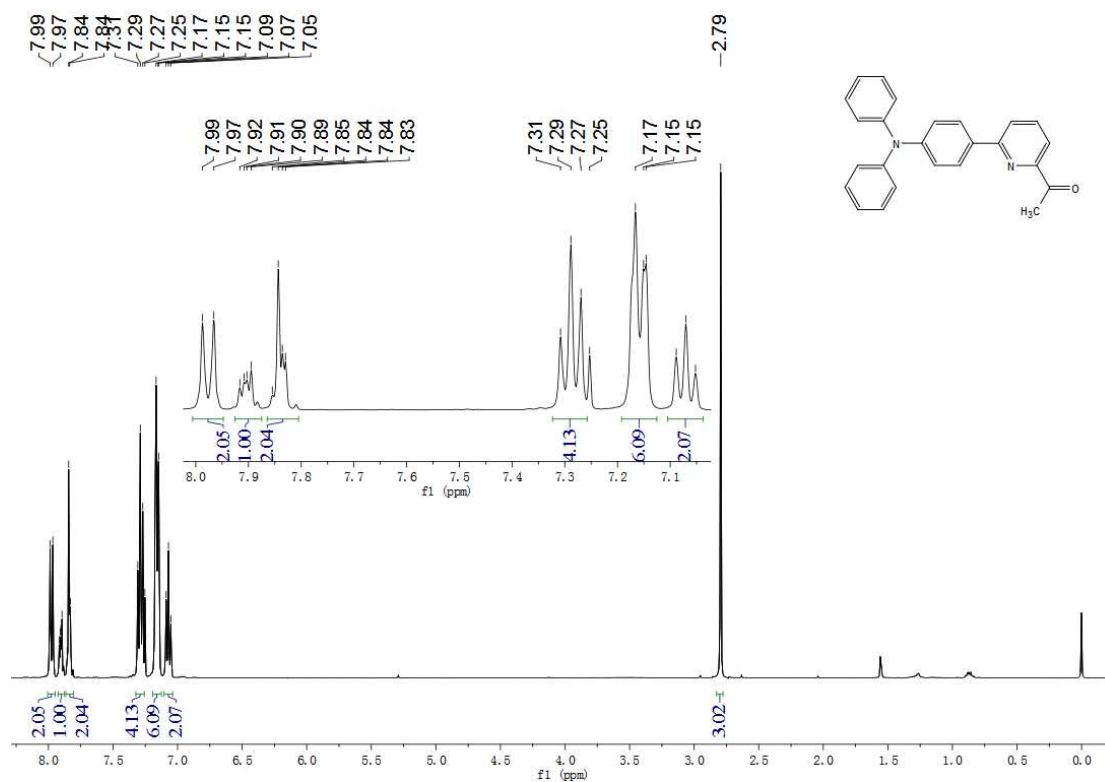

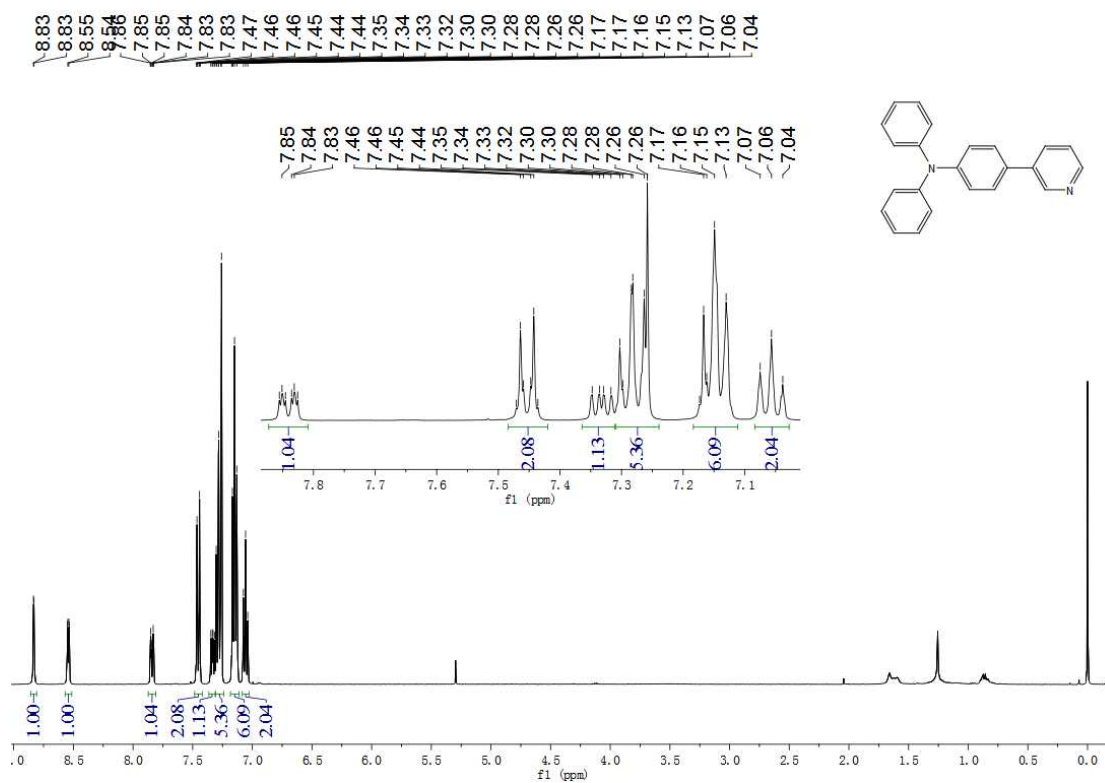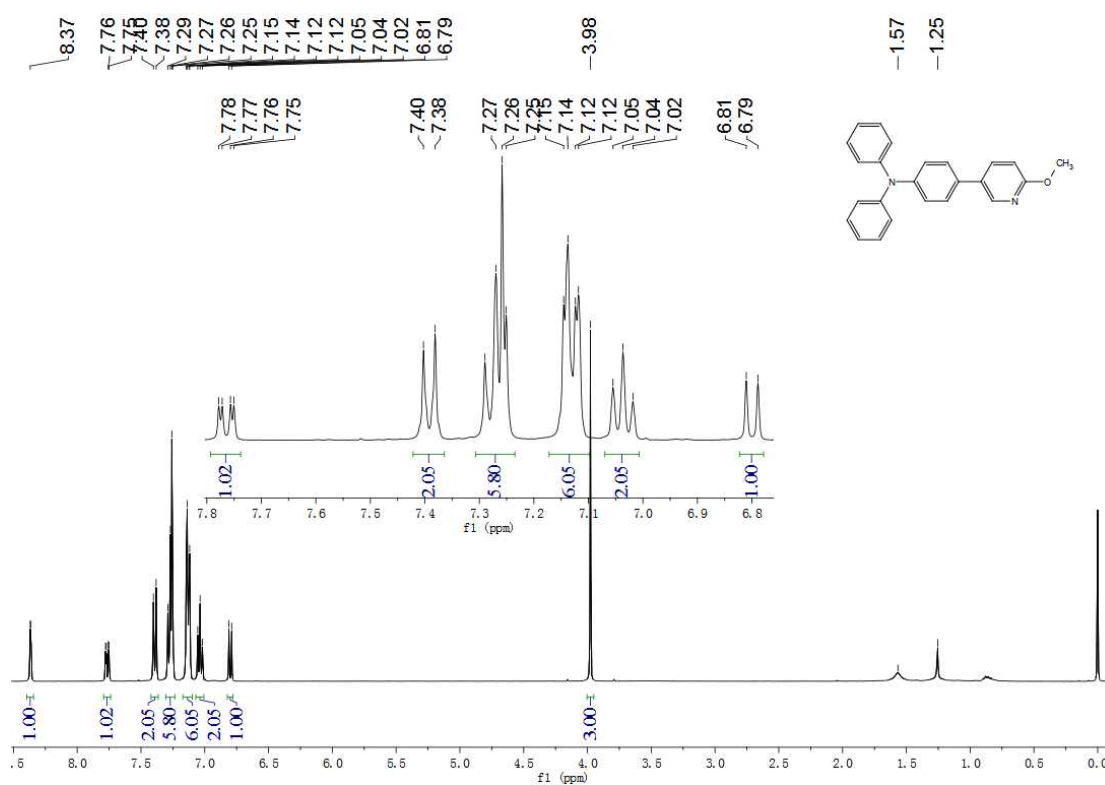

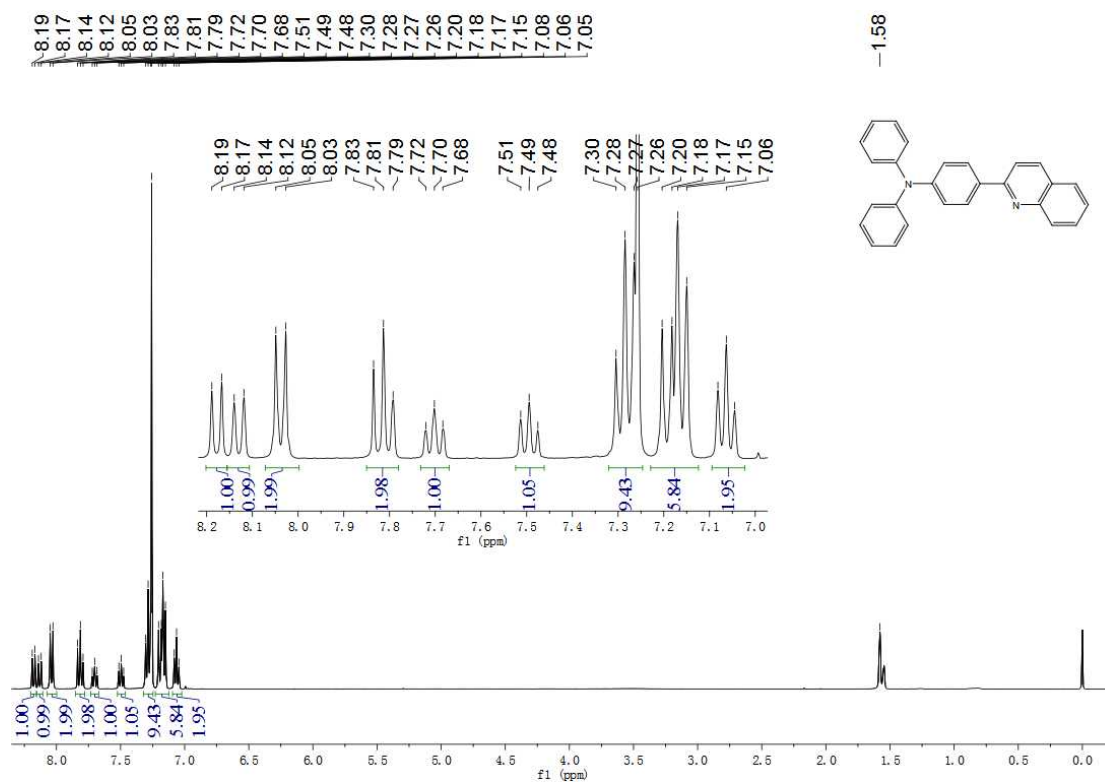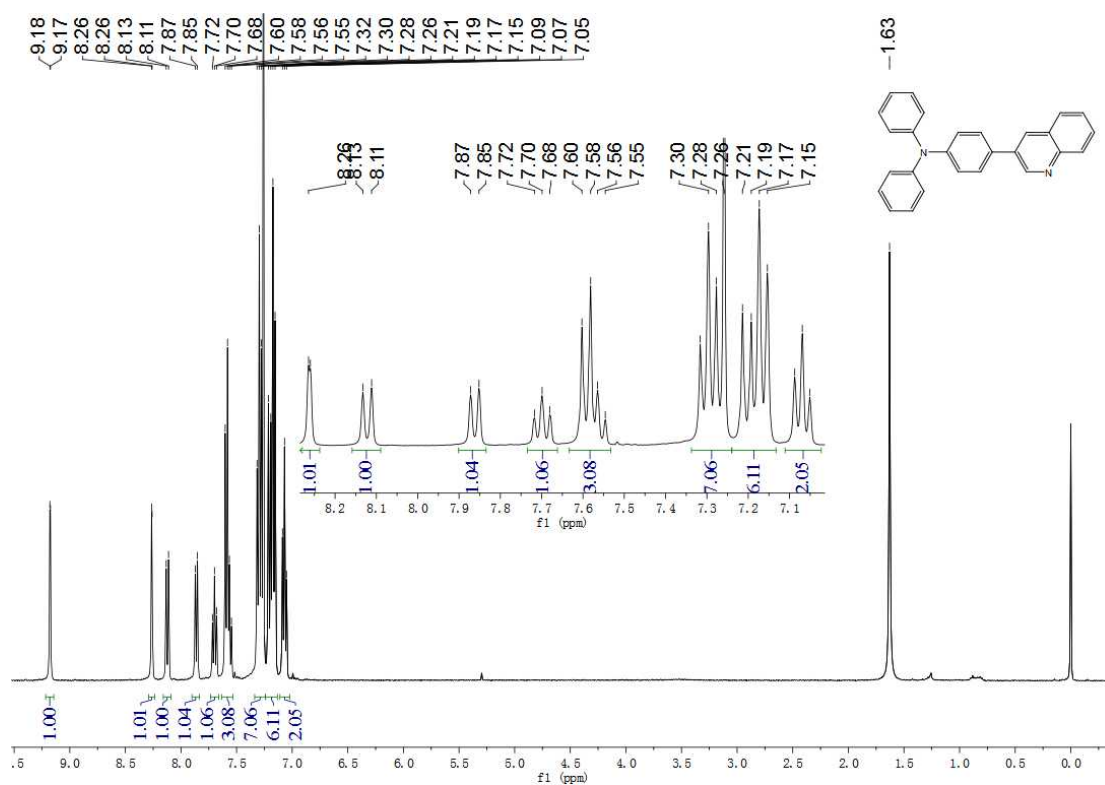



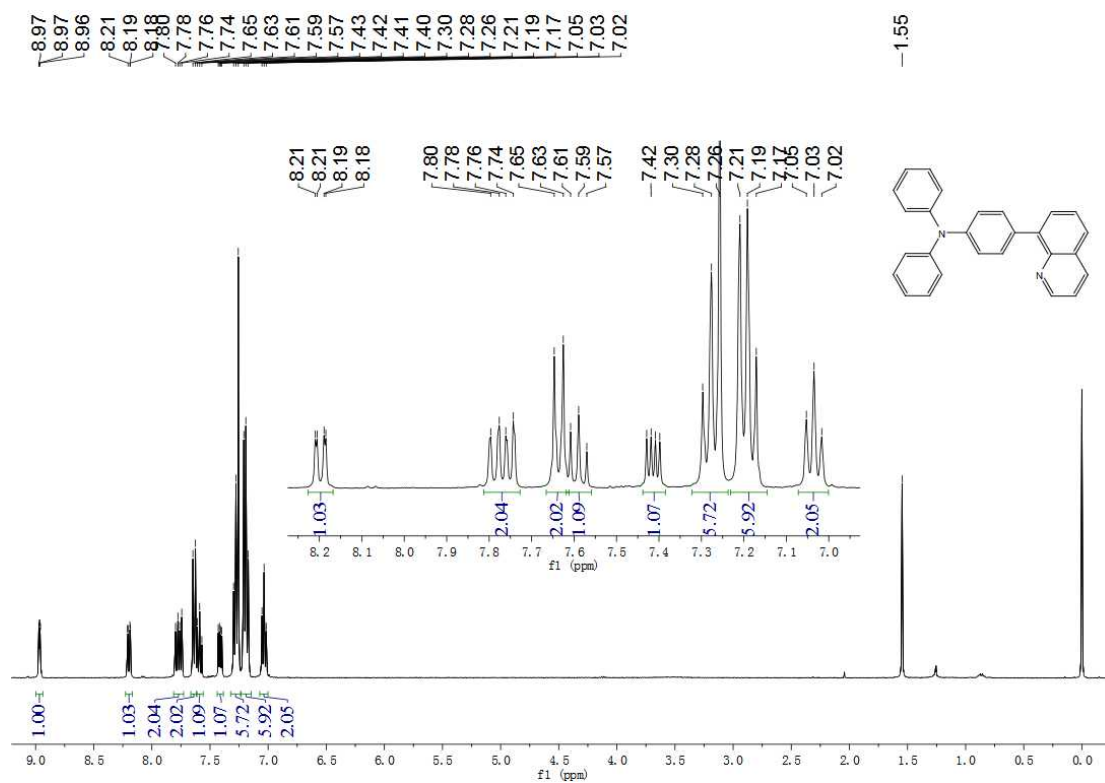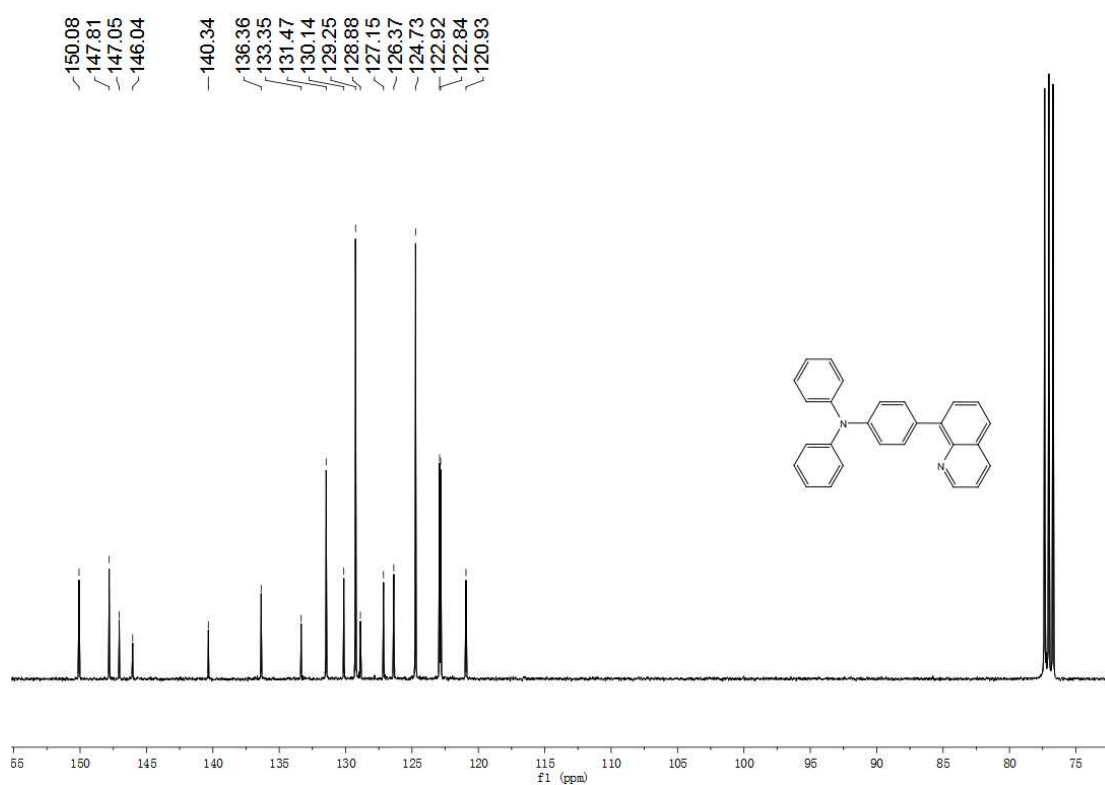

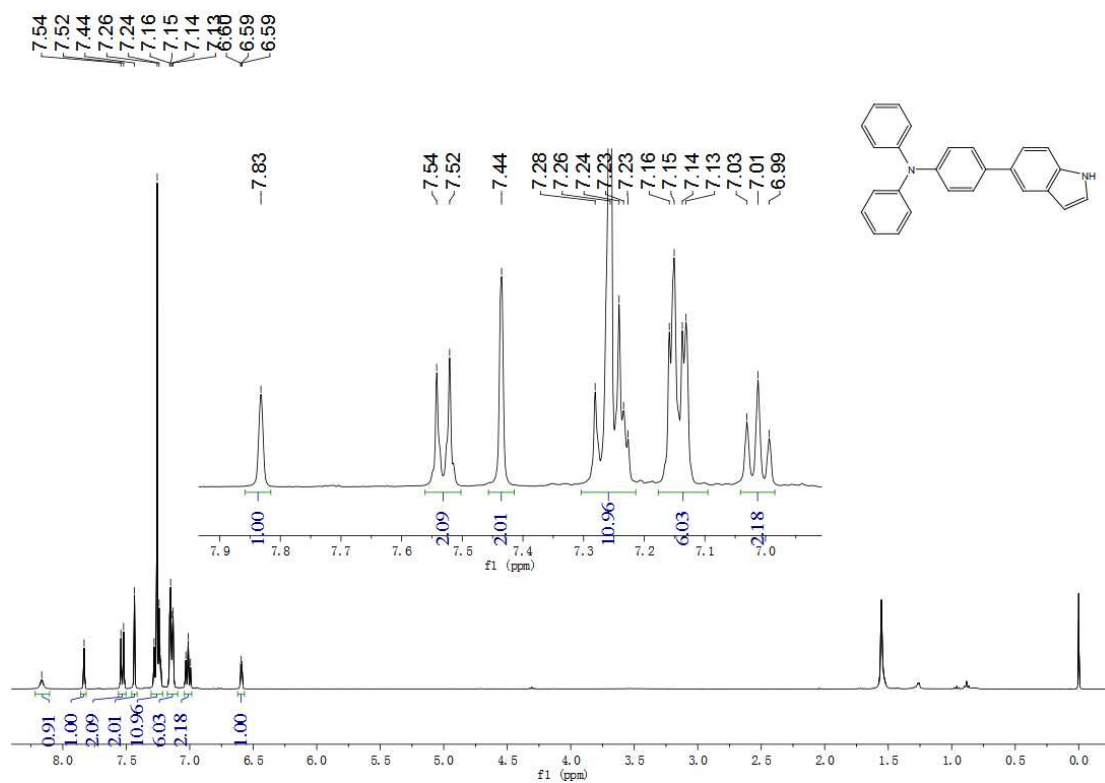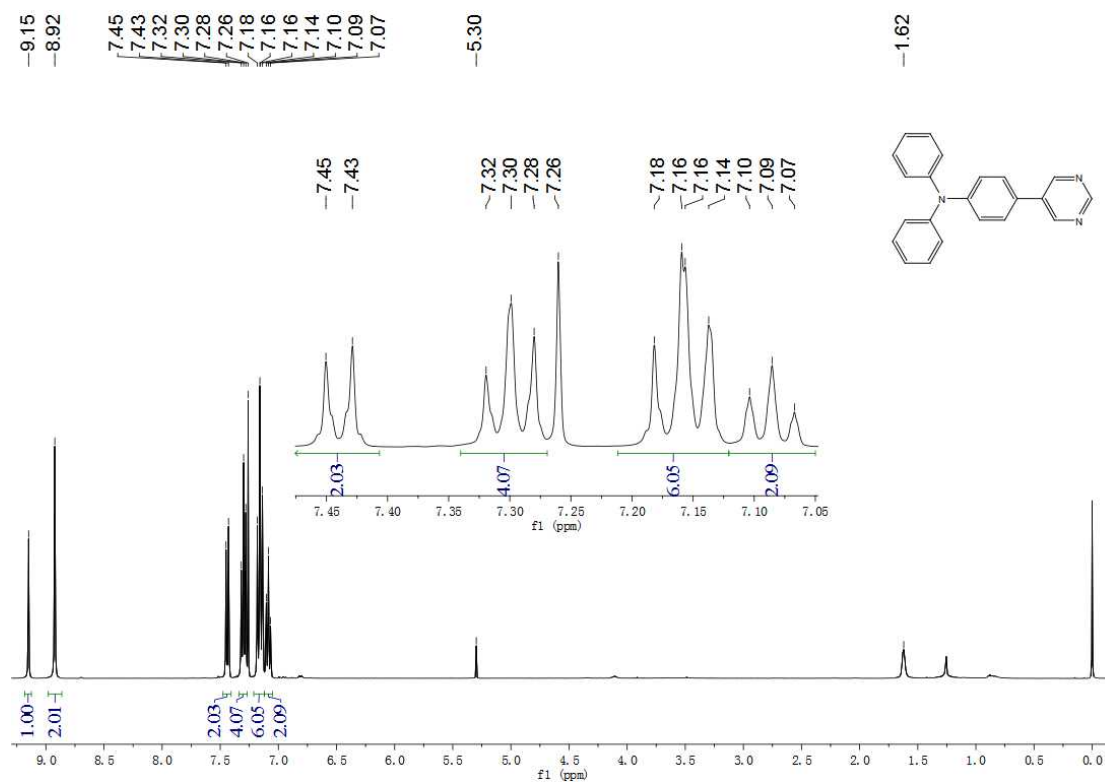

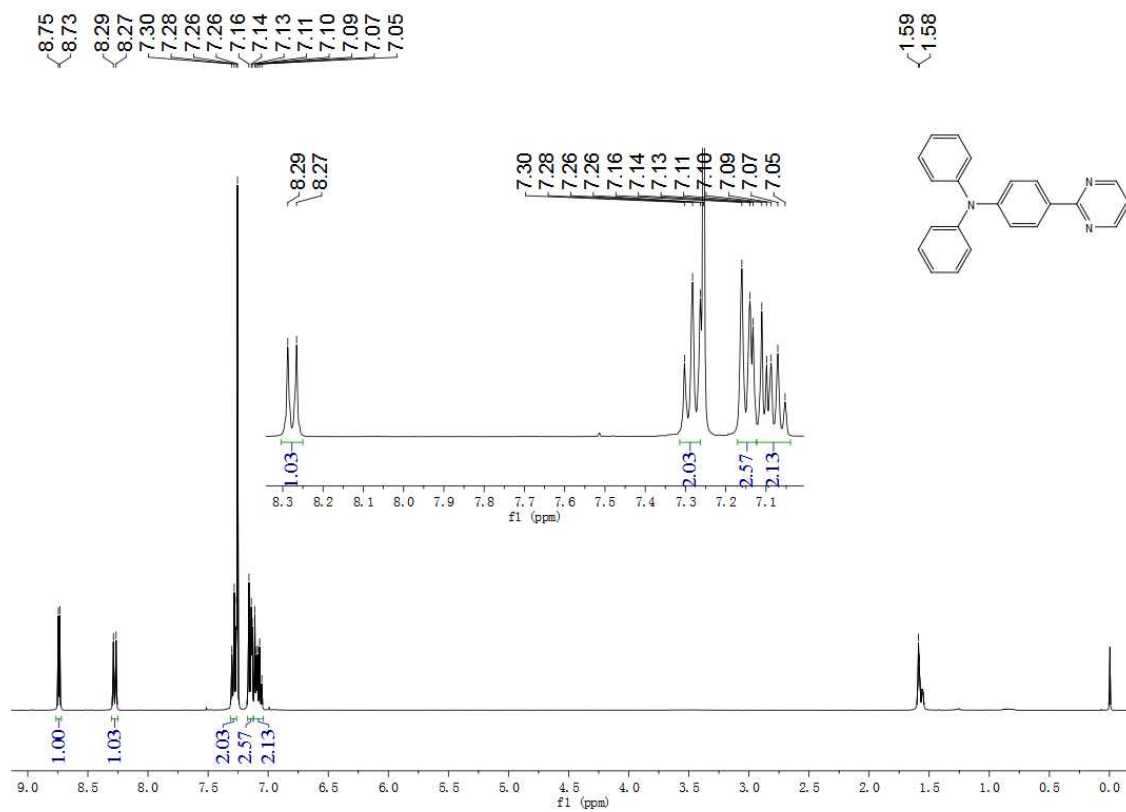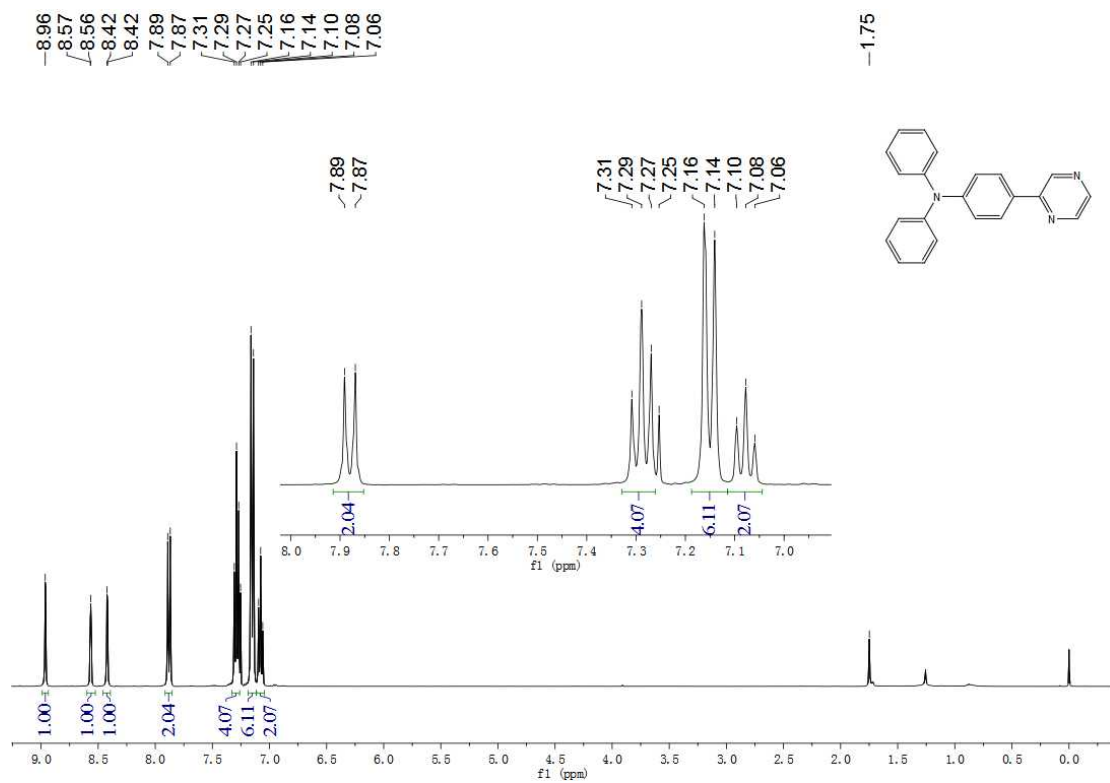

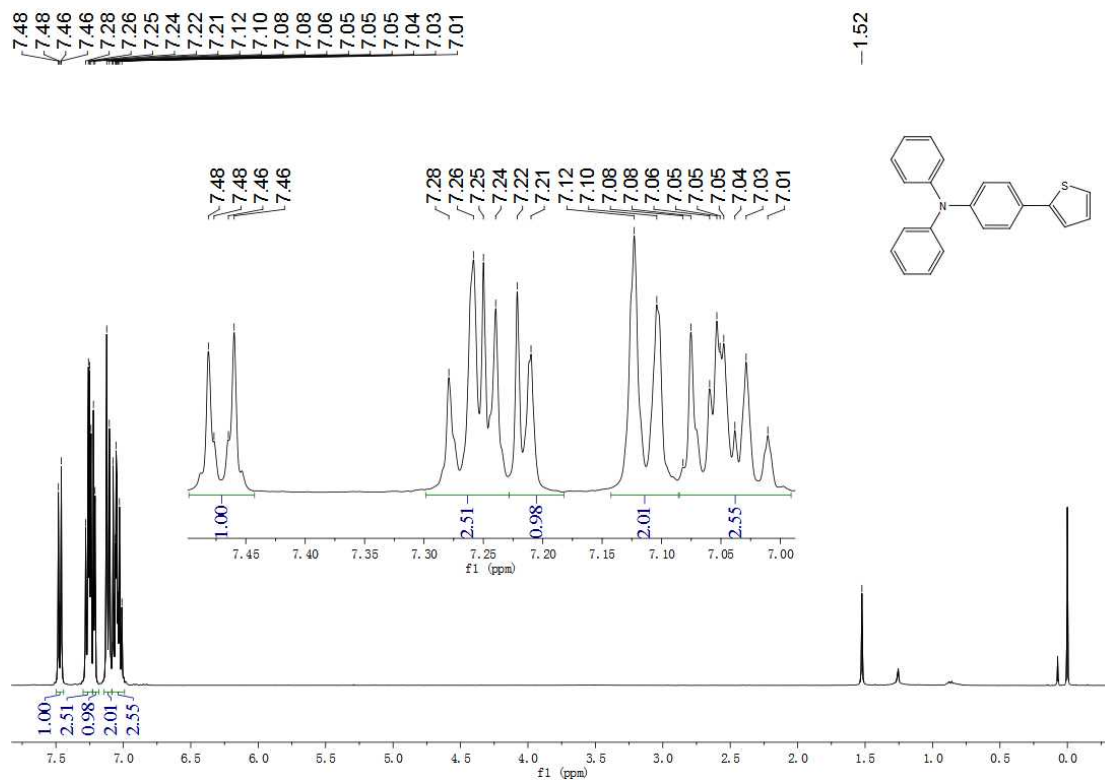

-152

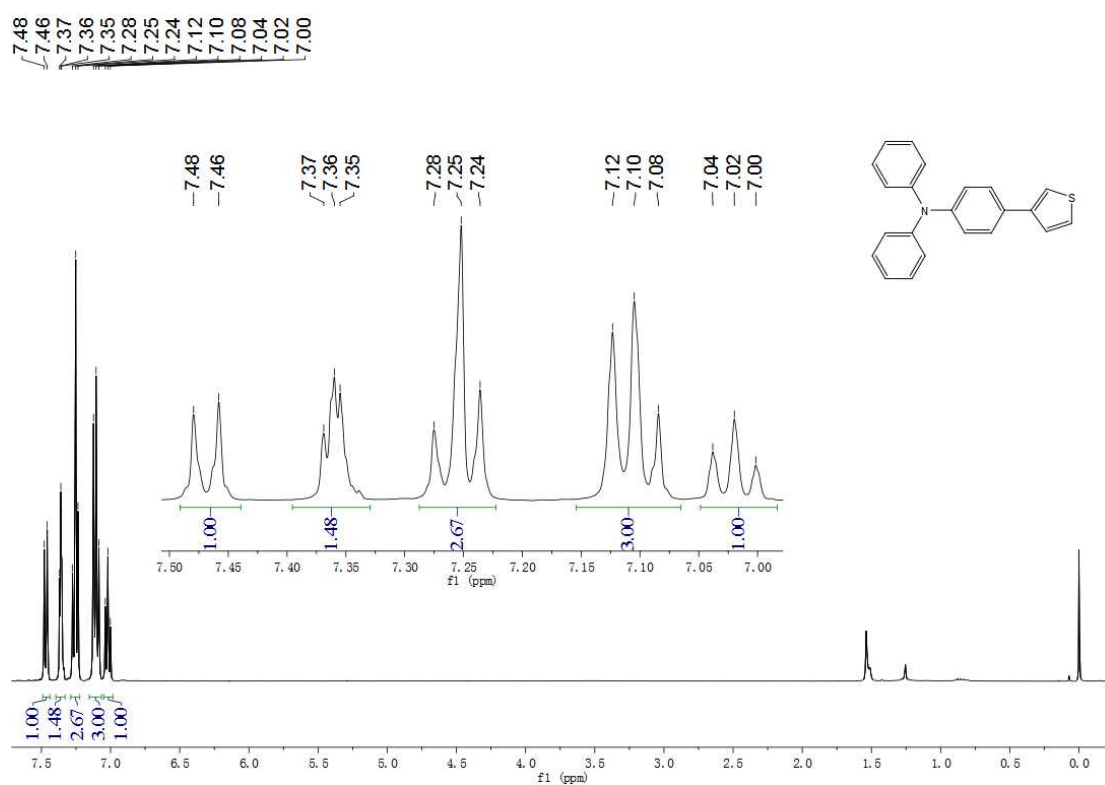

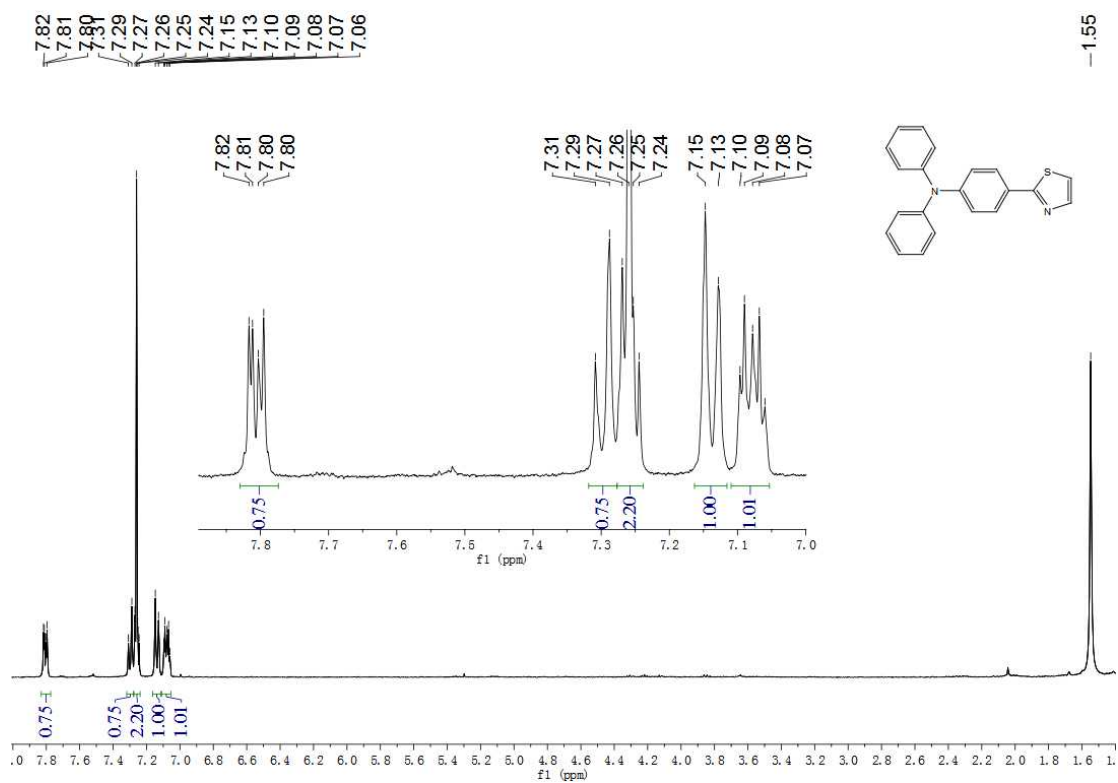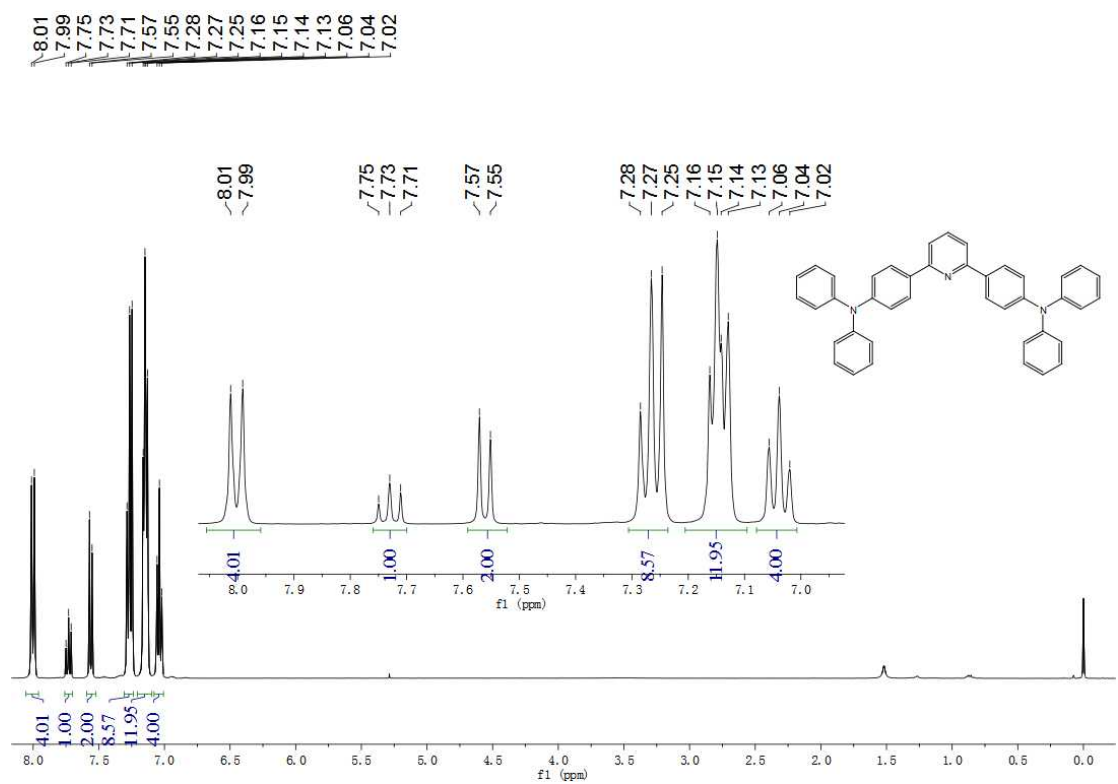

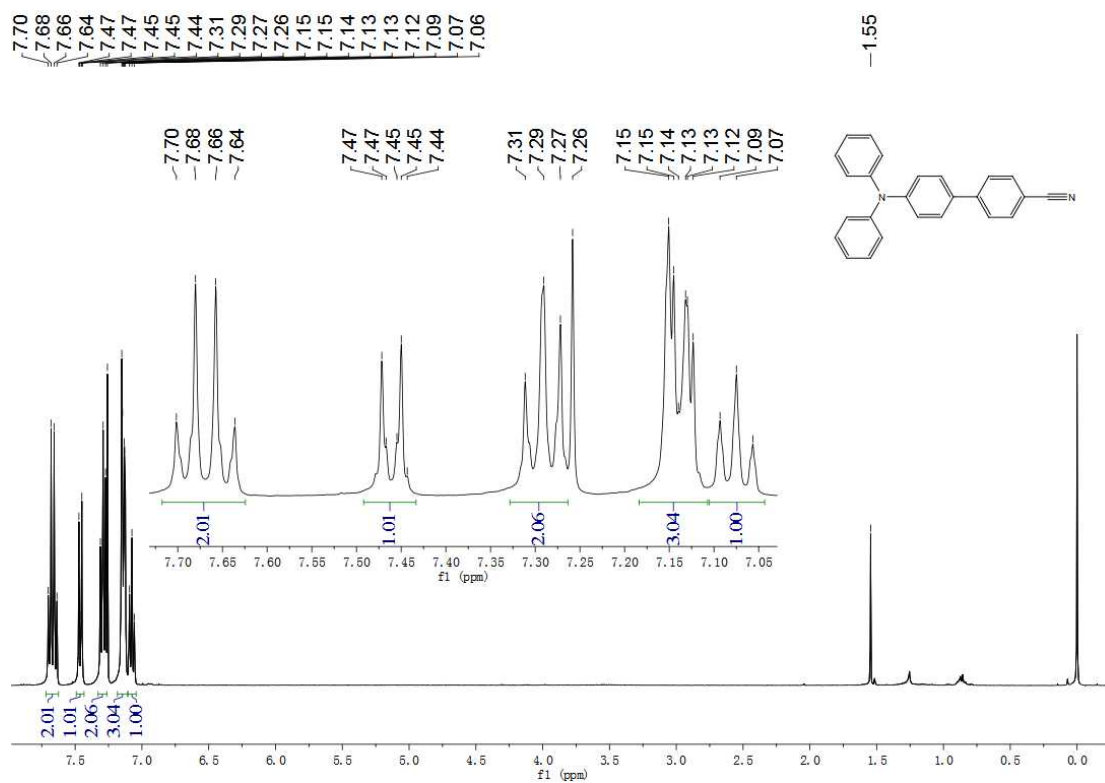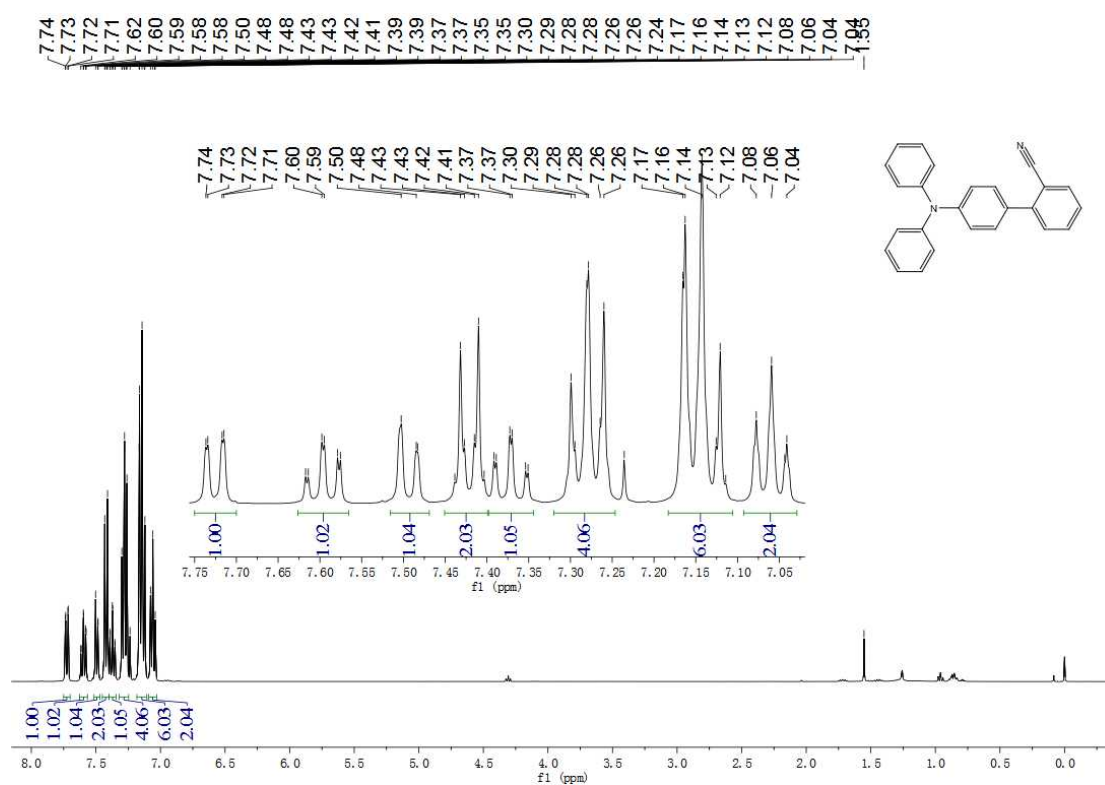

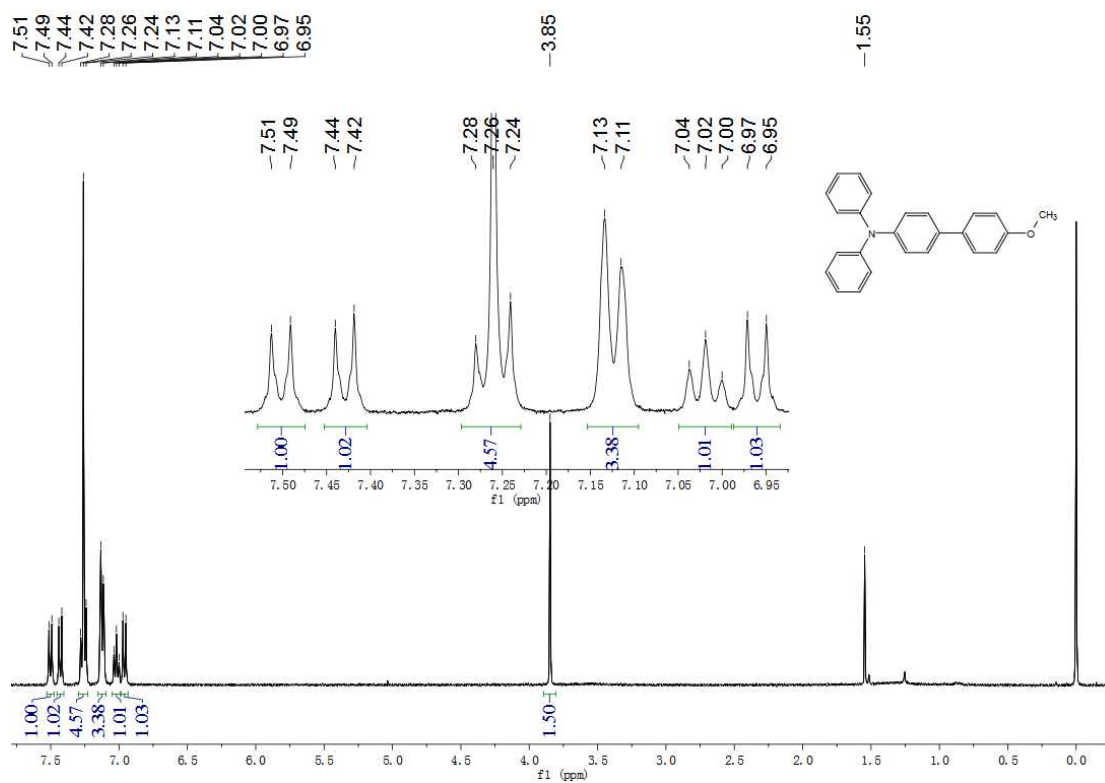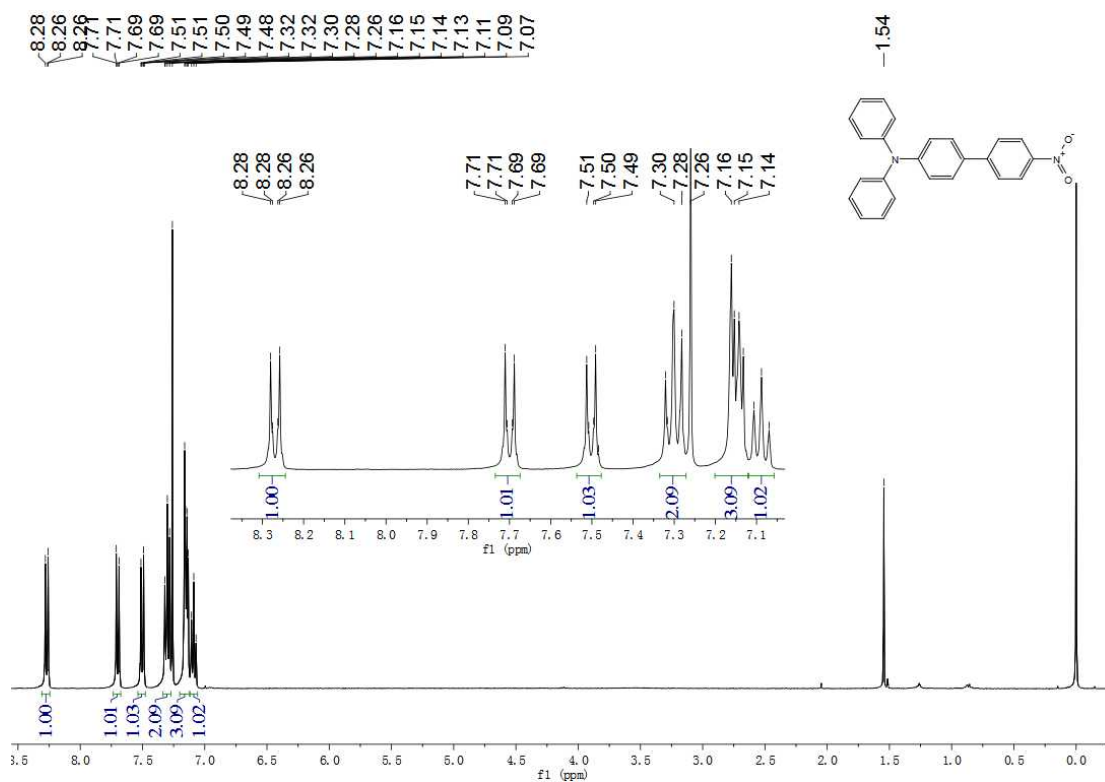

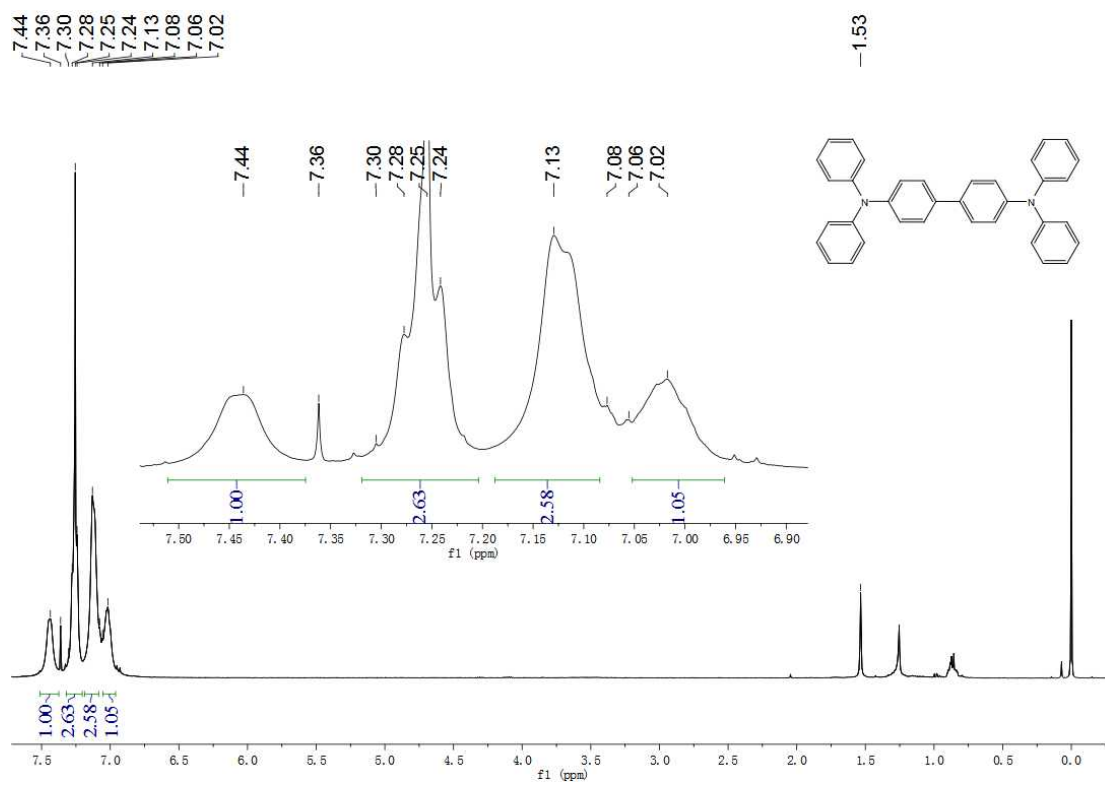

Supplement: c2ra22275b.pdf [file c2ra22275b.pdf]
